# Supplementary material for: 6-Azido hyacinthacine A2gives a straightforward access to the first multivalent pyrrolizidine architectures
Source: Royal Society of Chemistry journal article supplement (doi:10.1039/c4ob01117a), 2014-06-24
Supplement: c4ob01117a1.pdf [file c4ob01117a1.pdf]

# 6-Azido hyacinthacine A<sub>2</sub> gives a straightforward access to the first multivalent pyrrolizidine architectures

Giampiero D'Adamio,<sup>a,b</sup> Camilla Parmeggiani,<sup>a,b,c</sup> Andrea Goti,<sup>a\*</sup> Antonio J. Moreno-Vargas,<sup>d</sup> Elena Moreno-Clavijo,<sup>d</sup> Inmaculada Robina<sup>d</sup> and Francesca Cardona<sup>a\*</sup>

<sup>a</sup>*Dipartimento di Chimica "Ugo Schiff", Università di Firenze, Via della Lastruccia 3-13, 50019 Sesto Fiorentino (FI), Italy*

<sup>b</sup>*European Laboratory for Non Linear Spectroscopy (LENS), via Nello Carrara 1, 50019 Sesto Fiorentino (FI), Italy*

<sup>c</sup>*CNR-INO, U.O.S. Sesto Fiorentino and LENS, via Nello Carrara 1, 50019 Sesto Fiorentino (FI), Italy.*

<sup>d</sup>*Departamento de Química Orgánica, Facultad de Química, Universidad de Sevilla, c/ Prof. García González 1, E-41012, Sevilla, Spain.*

E-mail: [francesca.cardona@unifi.it](mailto:francesca.cardona@unifi.it), [andrea.goti@unifi.it](mailto:andrea.goti@unifi.it)

## Supporting Information

## Table of Contents

---

|                                                                  |     |
|------------------------------------------------------------------|-----|
| Figure S1. <sup>1</sup> H-NMR Spectrum of compound <b>4</b> .    | S7  |
| Figure S2. <sup>13</sup> C-NMR Spectrum of compound <b>4</b> .   | S7  |
| Figure S3. <sup>1</sup> H-NMR Spectrum of compound <b>5</b> .    | S8  |
| Figure S4. <sup>13</sup> C-NMR Spectrum of compound <b>5</b> .   | S8  |
| Figure S5. <sup>1</sup> H-NMR Spectrum of compound <b>7a</b> .   | S9  |
| Figure S6. <sup>13</sup> C-NMR Spectrum of compound <b>7a</b> .  | S9  |
| Figure S7. <sup>1</sup> H-NMR Spectrum of compound <b>7b</b> .   | S10 |
| Figure S8. <sup>13</sup> C-NMR Spectrum of compound <b>7b</b> .  | S10 |
| Figure S9. <sup>1</sup> H-NMR Spectrum of compound <b>7c</b> .   | S11 |
| Figure S10. <sup>13</sup> C-NMR Spectrum of compound <b>7c</b> . | S11 |
| Figure S11. <sup>1</sup> H-NMR Spectrum of compound <b>7d</b> .  | S12 |
| Figure S12. <sup>13</sup> C-NMR Spectrum of compound <b>7d</b> . | S12 |
| Figure S13. <sup>1</sup> H-NMR Spectrum of compound <b>7e</b> .  | S13 |
| Figure S14. <sup>13</sup> C-NMR Spectrum of compound <b>7e</b> . | S13 |
| Figure S15. <sup>1</sup> H-NMR Spectrum of compound <b>7f</b> .  | S14 |
| Figure S16. <sup>13</sup> C-NMR Spectrum of compound <b>7f</b> . | S14 |
| Figure S17. <sup>1</sup> H-NMR Spectrum of compound <b>8a</b> .  | S15 |

|                                                                     |     |
|---------------------------------------------------------------------|-----|
| Figure S18. $^{13}\text{C}$ -NMR Spectrum of compound <b>8a</b> .   | S15 |
| Figure S19. $^1\text{H}$ -NMR Spectrum of compound <b>8b</b> .      | S16 |
| Figure S20. $^{13}\text{C}$ -NMR Spectrum of compound <b>8b</b> .   | S16 |
| Figure S21. $^1\text{H}$ -NMR Spectrum of compound <b>8c</b> .      | S17 |
| Figure S22. $^{13}\text{C}$ -NMR Spectrum of compound <b>8c</b> .   | S17 |
| Figure S23. $^1\text{H}$ -NMR Spectrum of compound <b>8d</b> .      | S18 |
| Figure S24. $^{13}\text{C}$ -NMR Spectrum of compound <b>8d</b> .   | S18 |
| Figure S25. $^1\text{H}$ -NMR Spectrum of compound <b>8e'</b> .     | S19 |
| Figure S26. $^{13}\text{C}$ -NMR Spectrum of compound <b>8e'</b> .  | S19 |
| Figure S27. $^1\text{H}$ -NMR Spectrum of compound <b>8e''</b> .    | S20 |
| Figure S28. $^{13}\text{C}$ -NMR Spectrum of compound <b>8e''</b> . | S20 |
| Figure S29. $^1\text{H}$ -NMR Spectrum of compound <b>8f</b> .      | S21 |
| Figure S30. $^{13}\text{C}$ -NMR Spectrum of compound <b>8f</b> .   | S21 |
| Figure S31. $^1\text{H}$ -NMR Spectrum of compound <b>10</b> .      | S22 |
| Figure S32. $^{13}\text{C}$ -NMR Spectrum of compound <b>10</b> .   | S22 |
| Figure S33. $^1\text{H}$ -NMR Spectrum of compound <b>12</b> .      | S23 |
| Figure S34. $^{13}\text{C}$ -NMR Spectrum of compound <b>12</b> .   | S23 |
| Figure S35. $^1\text{H}$ -NMR Spectrum of compound <b>13</b> .      | S24 |
| Figure S36. $^{13}\text{C}$ -NMR Spectrum of compound <b>13</b> .   | S24 |

|                                                                   |     |
|-------------------------------------------------------------------|-----|
| Figure S37. $^1\text{H}$ -NMR Spectrum of compound <b>16</b> .    | S25 |
| Figure S38. $^{13}\text{C}$ -NMR Spectrum of compound <b>16</b> . | S25 |
| Figure S39. $^1\text{H}$ -NMR Spectrum of compound <b>17</b> .    | S26 |
| Figure S40. $^{13}\text{C}$ -NMR Spectrum of compound <b>17</b> . | S26 |
| Figure S41. $^1\text{H}$ -NMR Spectrum of compound <b>18</b> .    | S27 |
| Figure S42. $^{13}\text{C}$ -NMR Spectrum of compound <b>18</b> . | S27 |
| Figure S43. $^1\text{H}$ -NMR Spectrum of compound <b>19</b> .    | S28 |
| Figure S44. $^{13}\text{C}$ -NMR Spectrum of compound <b>19</b> . | S28 |
| Figure S45. $^1\text{H}$ -NMR Spectrum of compound <b>20</b> .    | S29 |
| Figure S46. $^{13}\text{C}$ -NMR Spectrum of compound <b>20</b> . | S29 |
| Figure S47. $^1\text{H}$ -NMR Spectrum of compound <b>22</b> .    | S30 |
| Figure S48. $^{13}\text{C}$ -NMR Spectrum of compound <b>22</b> . | S30 |
| Figure S49. $^1\text{H}$ -NMR Spectrum of compound <b>23</b> .    | S31 |
| Figure S50. $^{13}\text{C}$ -NMR Spectrum of compound <b>23</b> . | S31 |
| Figure S51. $^1\text{H}$ -NMR Spectrum of compound <b>24</b> .    | S32 |
| Figure S52. $^{13}\text{C}$ -NMR Spectrum of compound <b>24</b> . | S32 |
| Figure S53. $^1\text{H}$ -NMR Spectrum of compound <b>28</b> .    | S33 |
| Figure S54. $^{13}\text{C}$ -NMR Spectrum of compound <b>28</b> . | S33 |
| Figure S55. $^1\text{H}$ -NMR Spectrum of compound <b>29</b> .    | S34 |

|                                                                                                    |     |
|----------------------------------------------------------------------------------------------------|-----|
| Figure S56. $^{13}\text{C}$ -NMR Spectrum of compound <b>29</b> .                                  | S34 |
| Figure S57. $^1\text{H}$ -NMR Spectrum of compound <b>30</b> .                                     | S35 |
| Figure S58. $^{13}\text{C}$ -NMR Spectrum of compound <b>30</b> .                                  | S35 |
| Figure S59. $^1\text{H}$ -NMR Spectrum of compound <b>31</b> .                                     | S36 |
| Figure S60. $^{13}\text{C}$ -NMR Spectrum of compound <b>31</b> .                                  | S36 |
| Figure S61. $^1\text{H}$ -NMR Spectrum of compound <b>32</b> .                                     | S37 |
| Figure S62. $^{13}\text{C}$ -NMR Spectrum of compound <b>32</b> .                                  | S37 |
| Figure S63. $\text{IC}_{50}$ of <b>6-<i>epi</i>-7-deoxycasuarine</b> towards Amyloglucosidase.     | S38 |
| Figure S64. Lineweaver-Burk Plot of <b>6-<i>epi</i>-7-deoxycasuarine</b> towards Amyloglucosidase. | S38 |
| Figure S65. $\text{IC}_{50}$ of compound <b>5</b> towards Amyloglucosidase.                        | S39 |
| Figure S66. Lineweaver-Burk Plot of compound <b>5</b> towards Amyloglucosidase.                    | S39 |
| Figure S67. $\text{IC}_{50}$ of compound <b>8a</b> towards Amyloglucosidase.                       | S40 |
| Figure S68. Lineweaver-Burk Plot of compound <b>8a</b> towards Amyloglucosidase.                   | S40 |
| Figure S69. $\text{IC}_{50}$ of compound <b>8b</b> towards Amyloglucosidase.                       | S41 |
| Figure S70. Lineweaver-Burk Plot of compound <b>8b</b> towards Amyloglucosidase.                   | S41 |
| Figure S71. $\text{IC}_{50}$ of compound <b>8c</b> towards Amyloglucosidase.                       | S42 |
| Figure S72. $\text{IC}_{50}$ of compound <b>8d</b> towards Amyloglucosidase.                       | S43 |
| Figure S73. Lineweaver-Burk Plot of compound <b>8d</b> towards Amyloglucosidase.                   | S43 |
| Figure S74. $\text{IC}_{50}$ of compound <b>8e'</b> towards Amyloglucosidase.                      | S44 |

|                                                                                    |     |
|------------------------------------------------------------------------------------|-----|
| Figure S75. Lineweaver-Burk Plot of compound <b>8e'</b> towards Amyloglucosidase.  | S44 |
| Figure S76. IC <sub>50</sub> of compound <b>8e''</b> towards Amyloglucosidase.     | S45 |
| Figure S77. Lineweaver-Burk Plot of compound <b>8e''</b> towards Amyloglucosidase. | S45 |
| Figure S78. IC <sub>50</sub> of compound <b>8f</b> towards Amyloglucosidase.       | S46 |
| Figure S79. IC <sub>50</sub> of compound <b>13</b> towards Amyloglucosidase.       | S47 |
| Figure S80. Lineweaver-Burk Plot of compound <b>13</b> towards Amyloglucosidase.   | S47 |
| Figure S81. IC <sub>50</sub> of compound <b>24</b> towards Amyloglucosidase.       | S48 |
| Figure S82. Lineweaver-Burk Plot of compound <b>24</b> towards Amyloglucosidase.   | S48 |
| Figure S83. IC <sub>50</sub> of compound <b>31</b> towards Amyloglucosidase.       | S49 |
| Figure S84. Lineweaver-Burk Plot of compound <b>31</b> towards Amyloglucosidase.   | S49 |
| Figure S85. IC <sub>50</sub> of compound <b>32</b> towards Amyloglucosidase.       | S50 |
| Figure S86. Lineweaver-Burk Plot of compound <b>32</b> towards Amyloglucosidase.   | S50 |

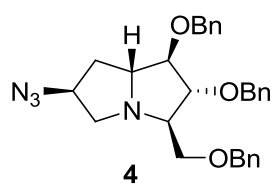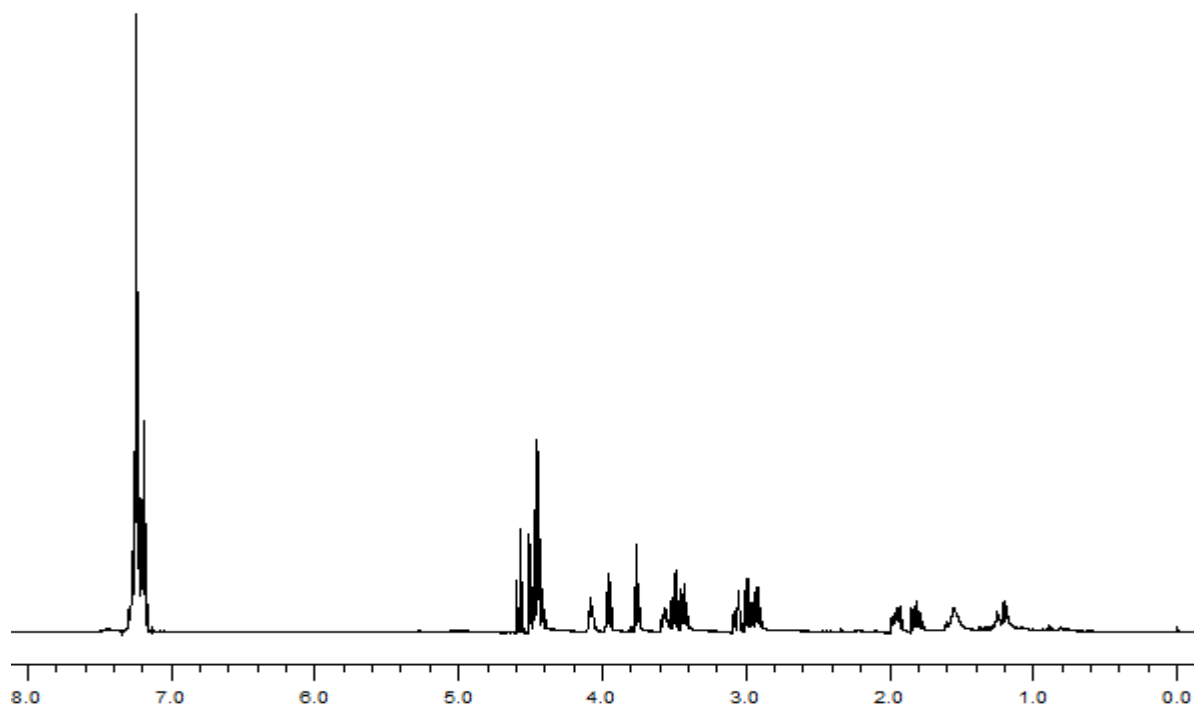

S1. <sup>1</sup>H-NMR spectrum of compound 4 (400 MHz, CDCl<sub>3</sub>).

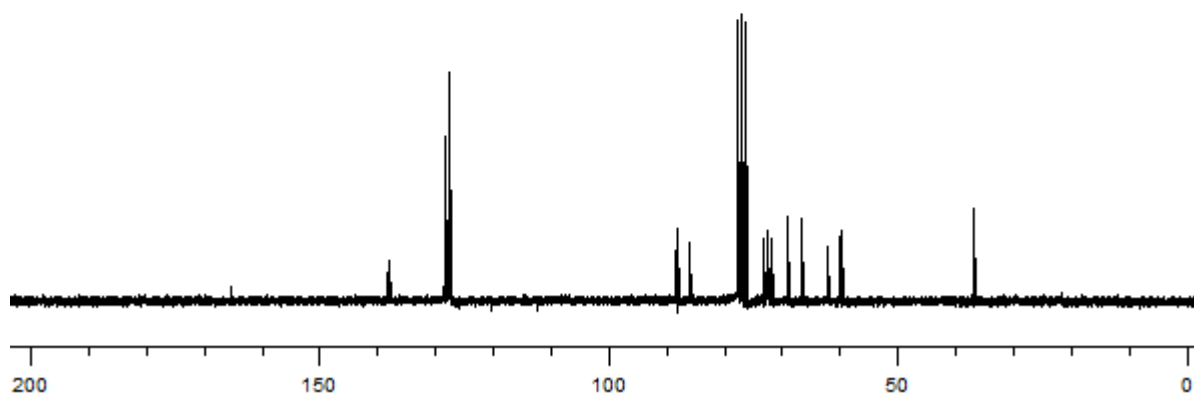

S2. <sup>13</sup>C-NMR spectrum of compound 4 (50 MHz, CDCl<sub>3</sub>).

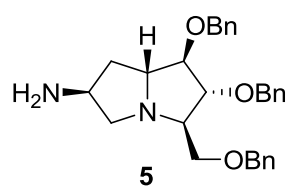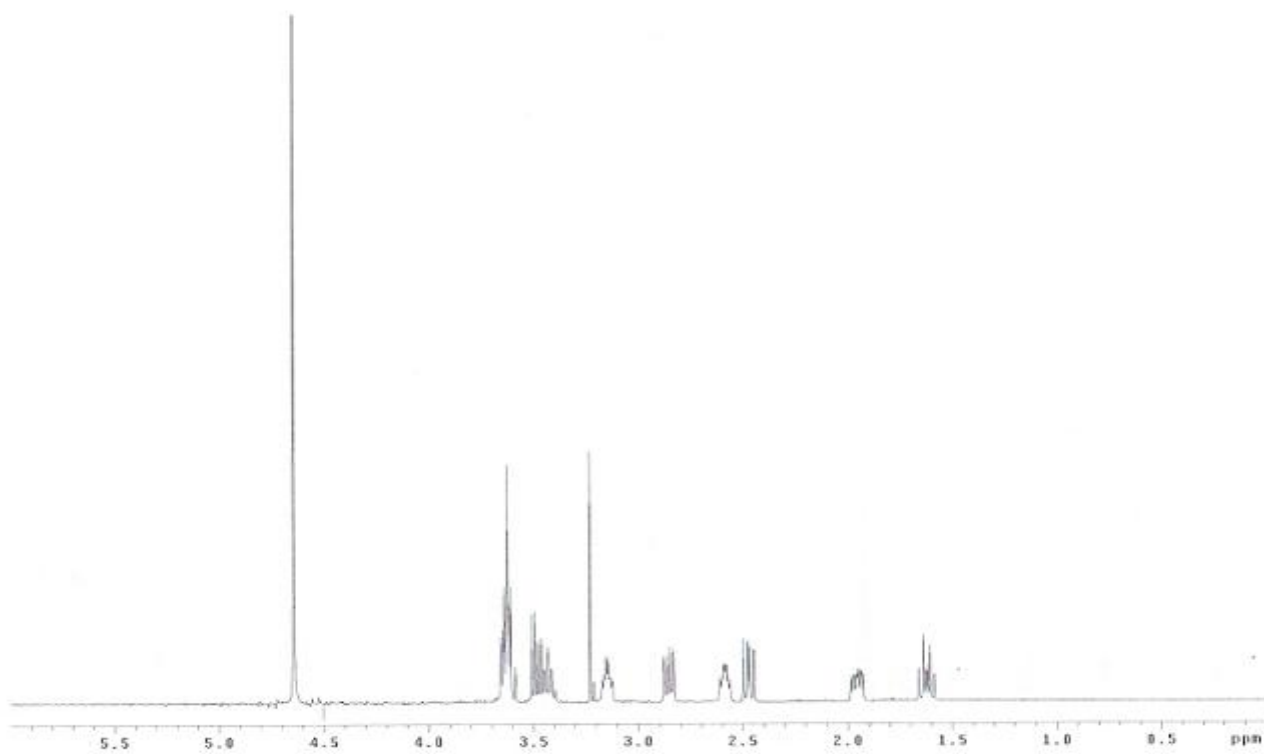

S3.  $^1\text{H-NMR}$  spectrum of compound 5 (400 MHz,  $\text{D}_2\text{O}$ ).

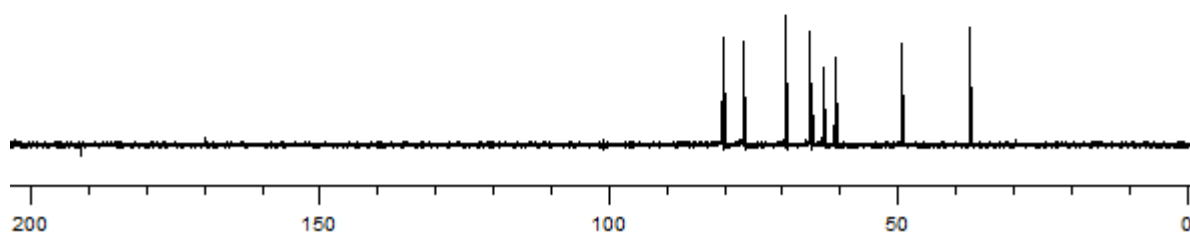

S4.  $^{13}\text{C-NMR}$  spectrum of compound 5 (50 MHz,  $\text{D}_2\text{O}$ ).



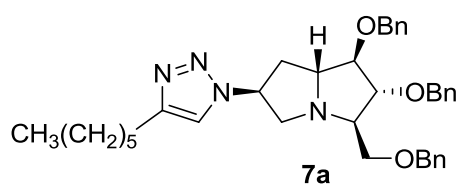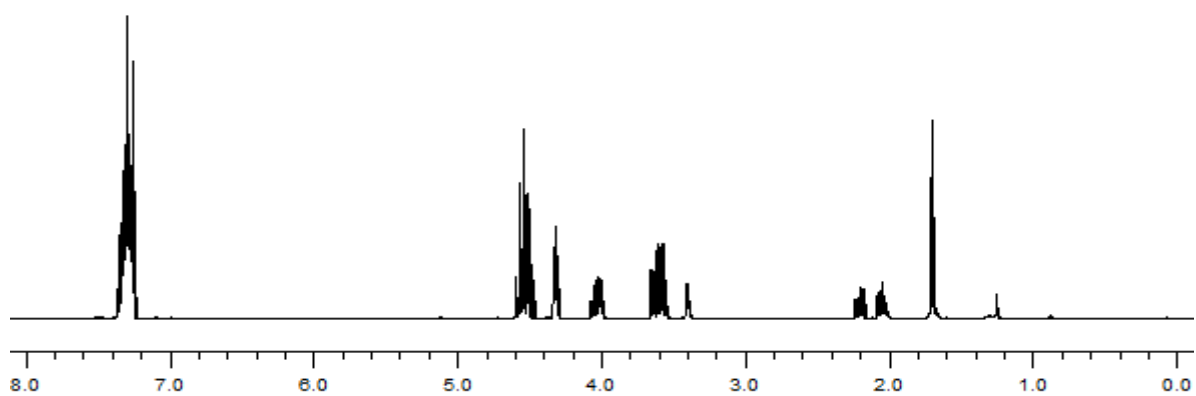

S5. <sup>1</sup>H-NMR spectrum of compound 7a (400 MHz, CDCl<sub>3</sub>).

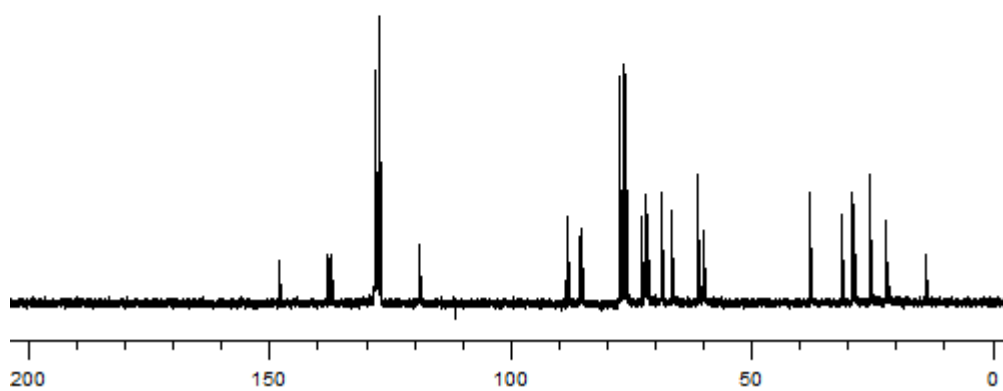

S6. <sup>13</sup>C-NMR spectrum of compound 7a (50 MHz, CDCl<sub>3</sub>).

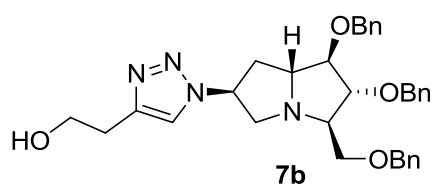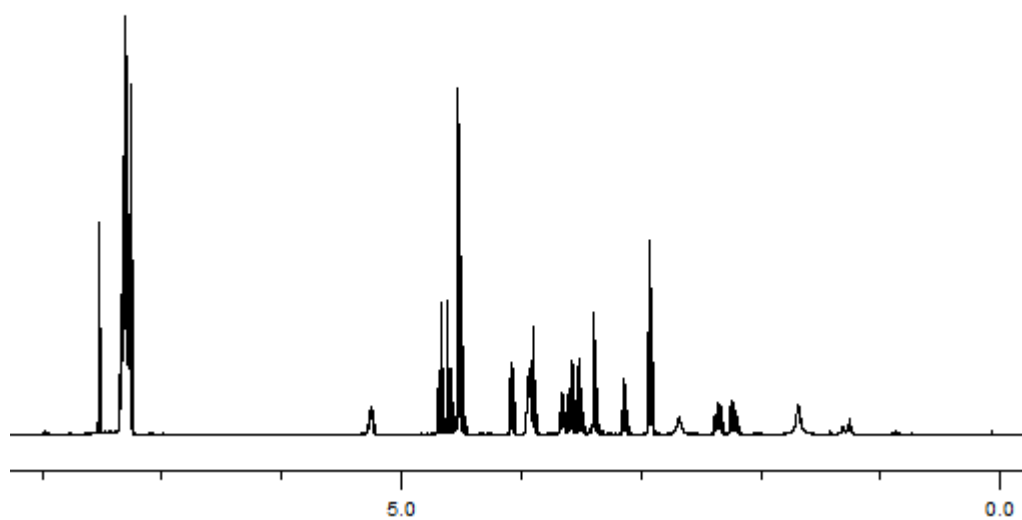

S7. <sup>1</sup>H-NMR spectrum of compound 7b (400 MHz, CDCl<sub>3</sub>).

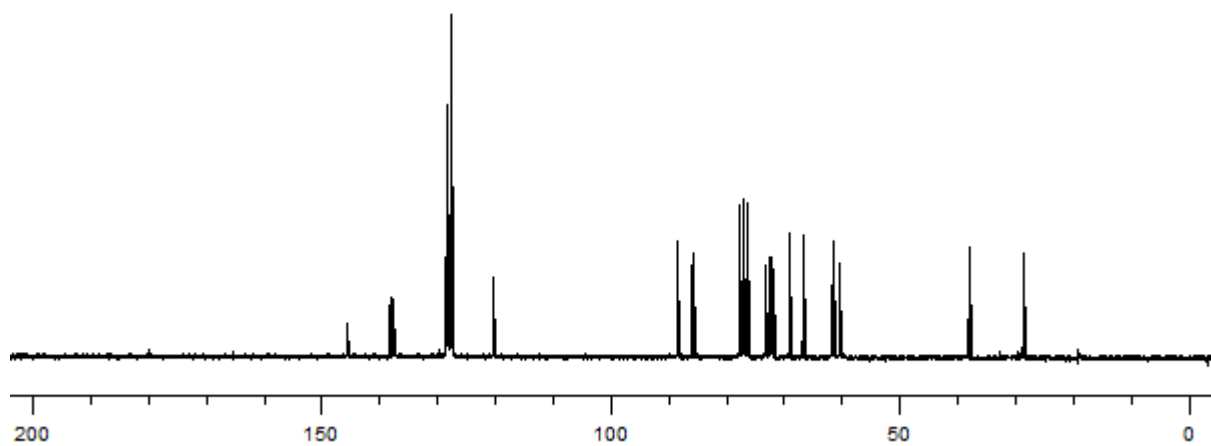

S8. <sup>13</sup>C-NMR spectrum of compound 7b (50 MHz, CDCl<sub>3</sub>).

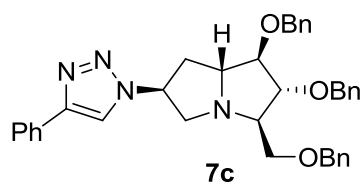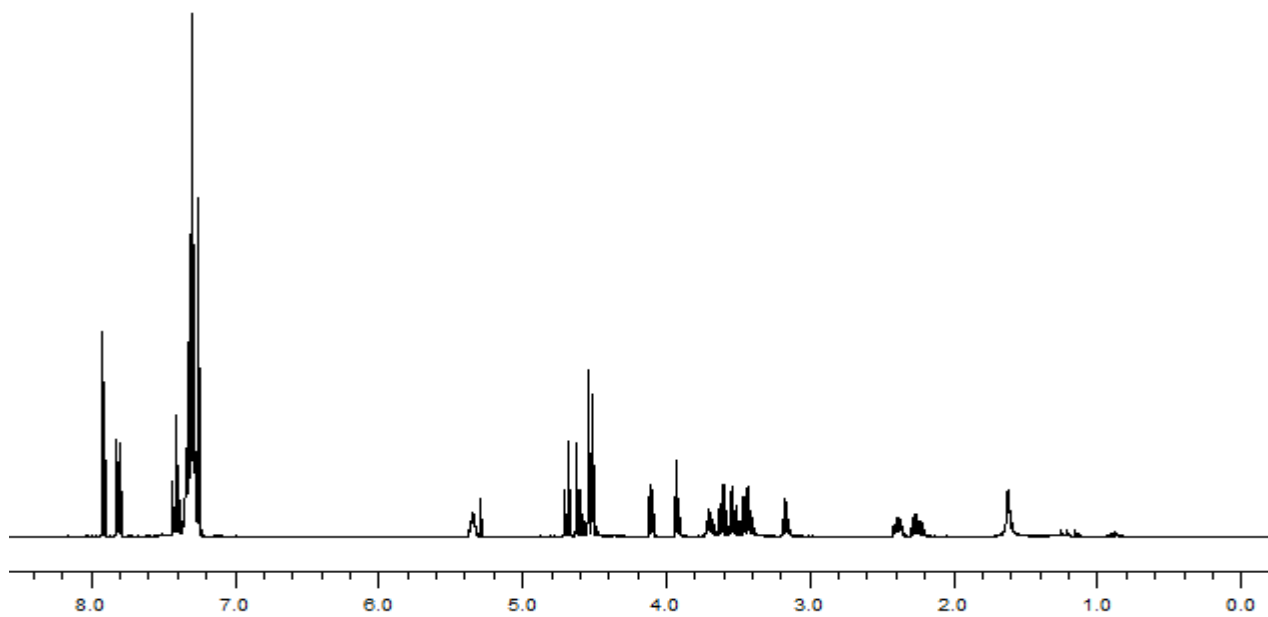

S9. <sup>1</sup>H-NMR spectrum of compound 7c (400 MHz, CDCl<sub>3</sub>).

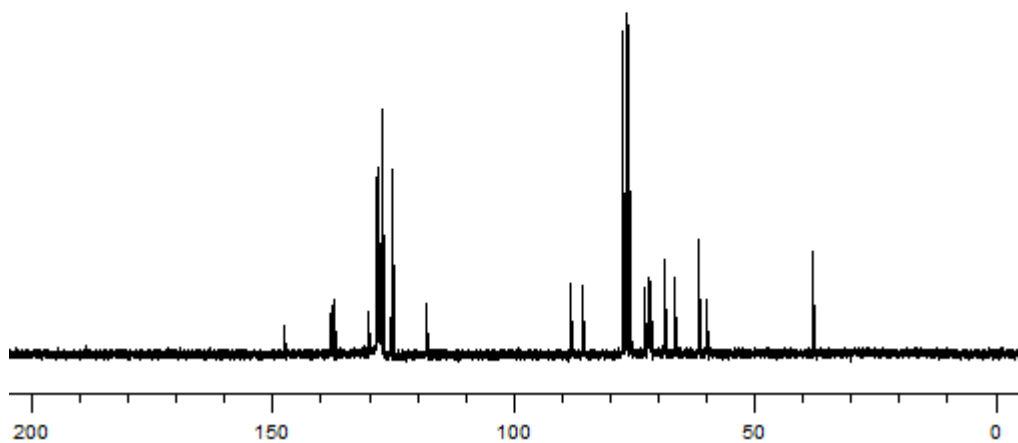

S10. <sup>13</sup>C-NMR spectrum of compound 7c (50 MHz, CDCl<sub>3</sub>).

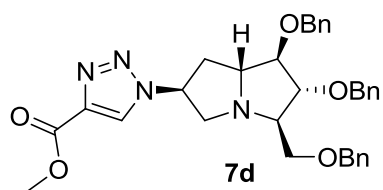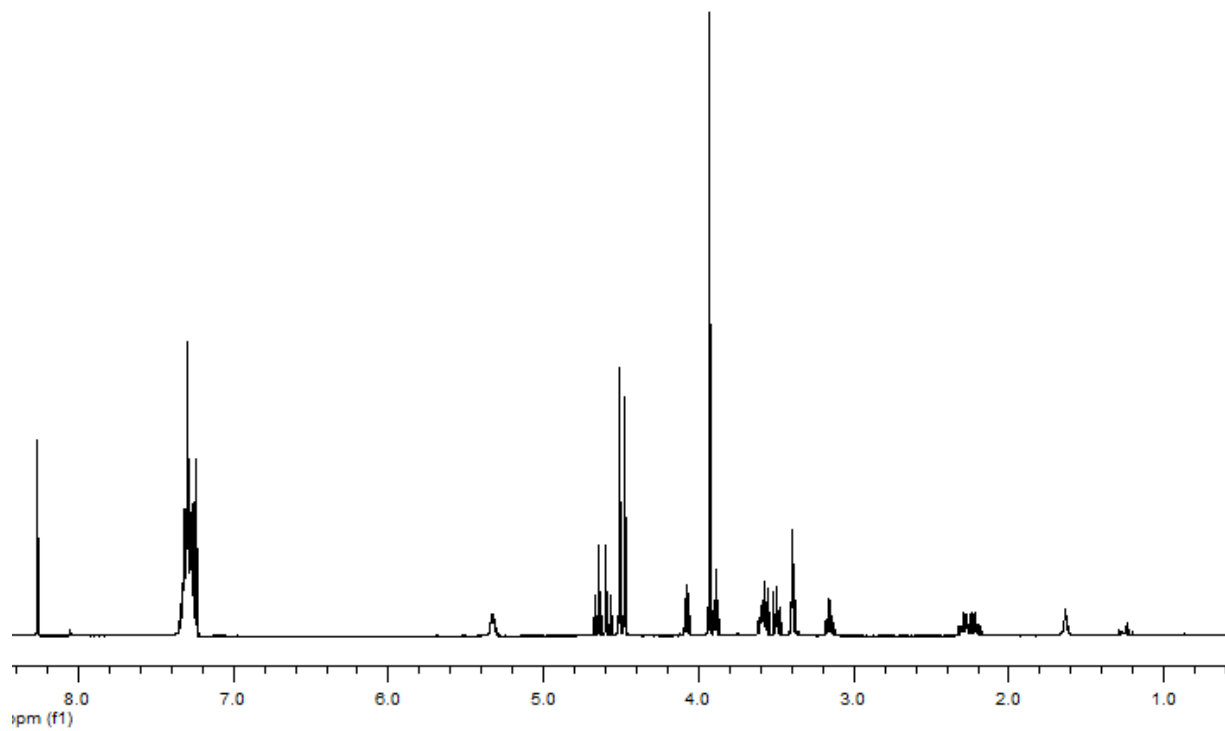

S11. <sup>1</sup>H-NMR spectrum of compound 7d (400 MHz, CDCl<sub>3</sub>).

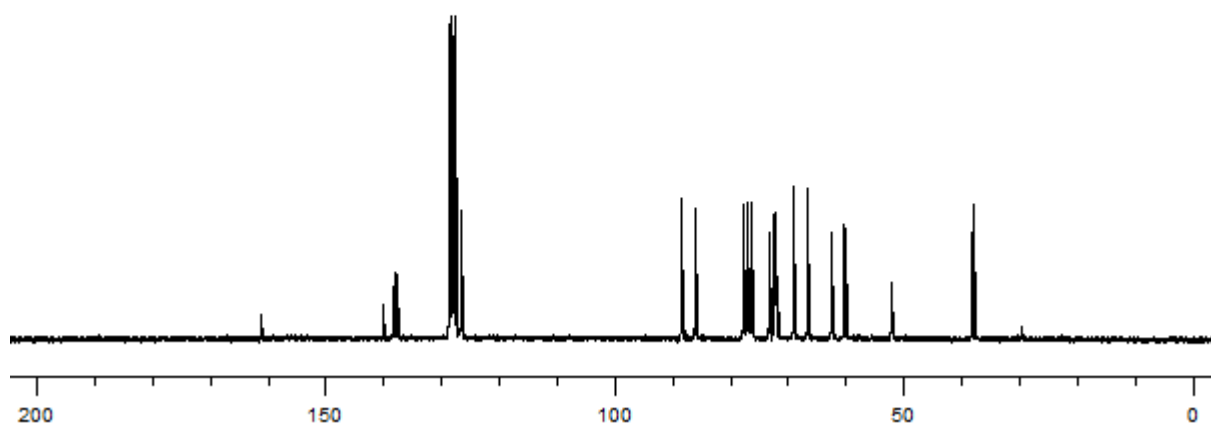

S12. <sup>13</sup>C-NMR spectrum of compound 7d (50 MHz, CDCl<sub>3</sub>).

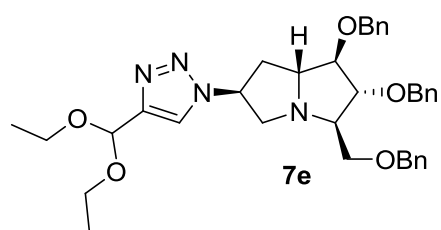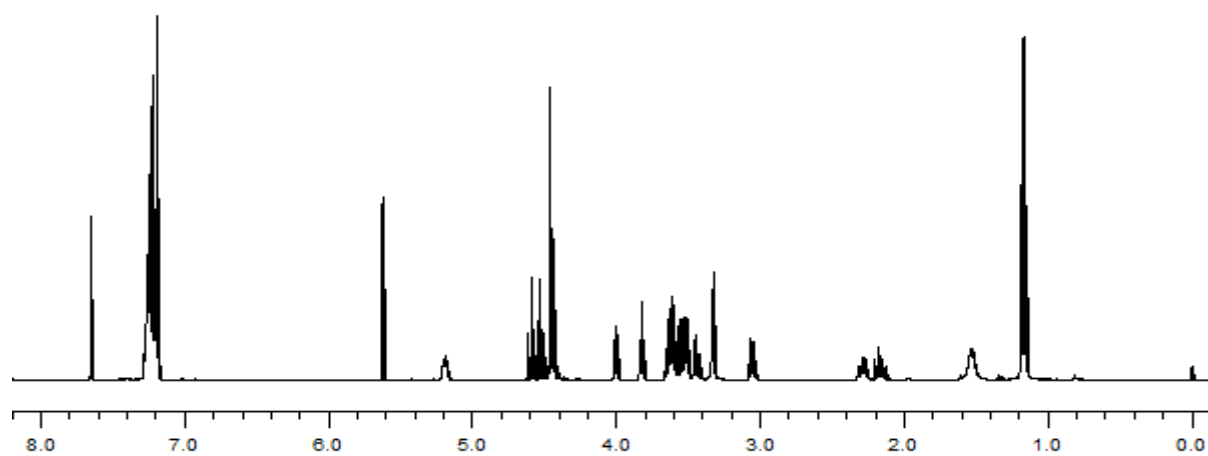

S13.  $^1\text{H-NMR}$  spectrum of compound 7e (400 MHz,  $\text{CDCl}_3$ ).

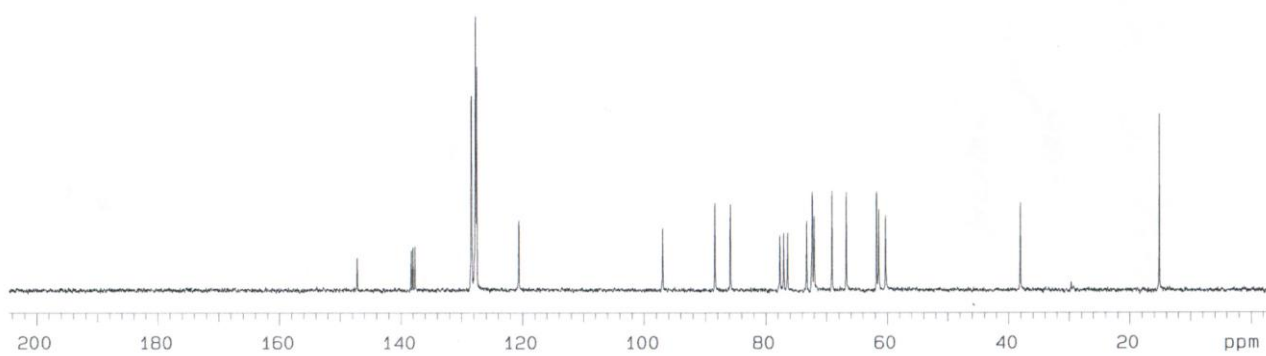

S14.  $^{13}\text{C-NMR}$  spectrum of compound 7e (50 MHz,  $\text{CDCl}_3$ ).

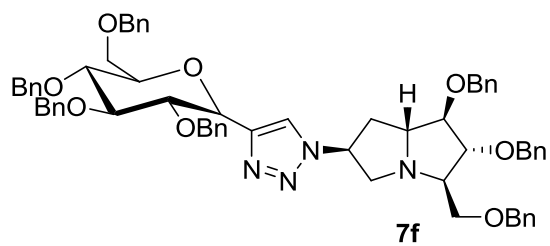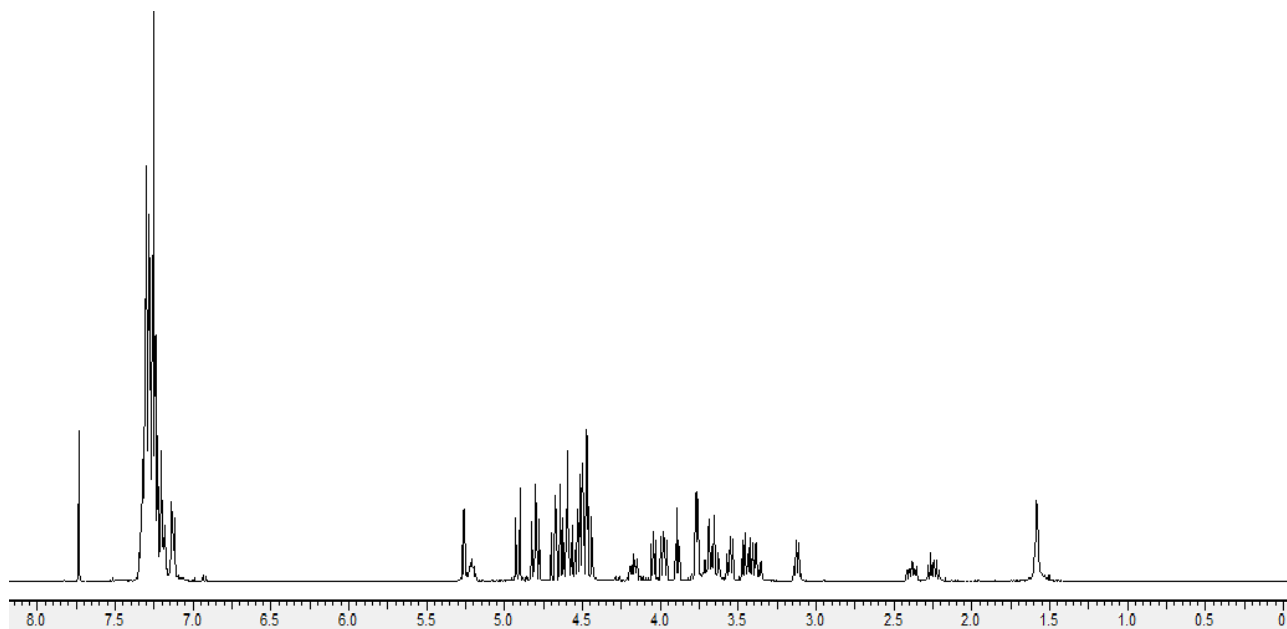

S15.  $^1\text{H-NMR}$  spectrum of compound 7f (400 MHz,  $\text{CDCl}_3$ ).

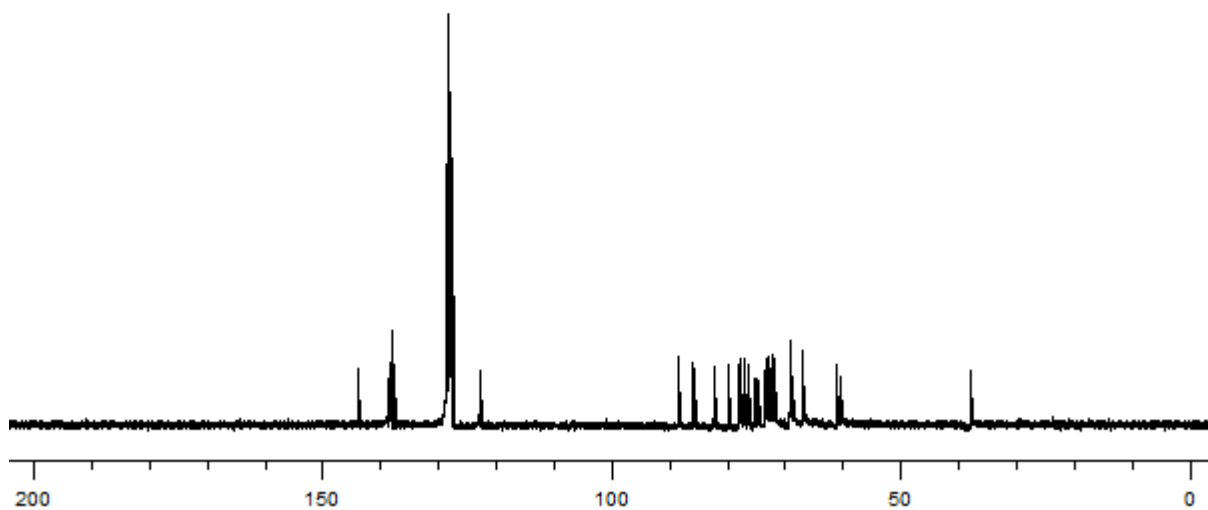

S16.  $^{13}\text{C-NMR}$  spectrum of compound 7f (50 MHz,  $\text{CDCl}_3$ ).

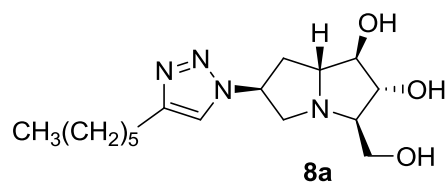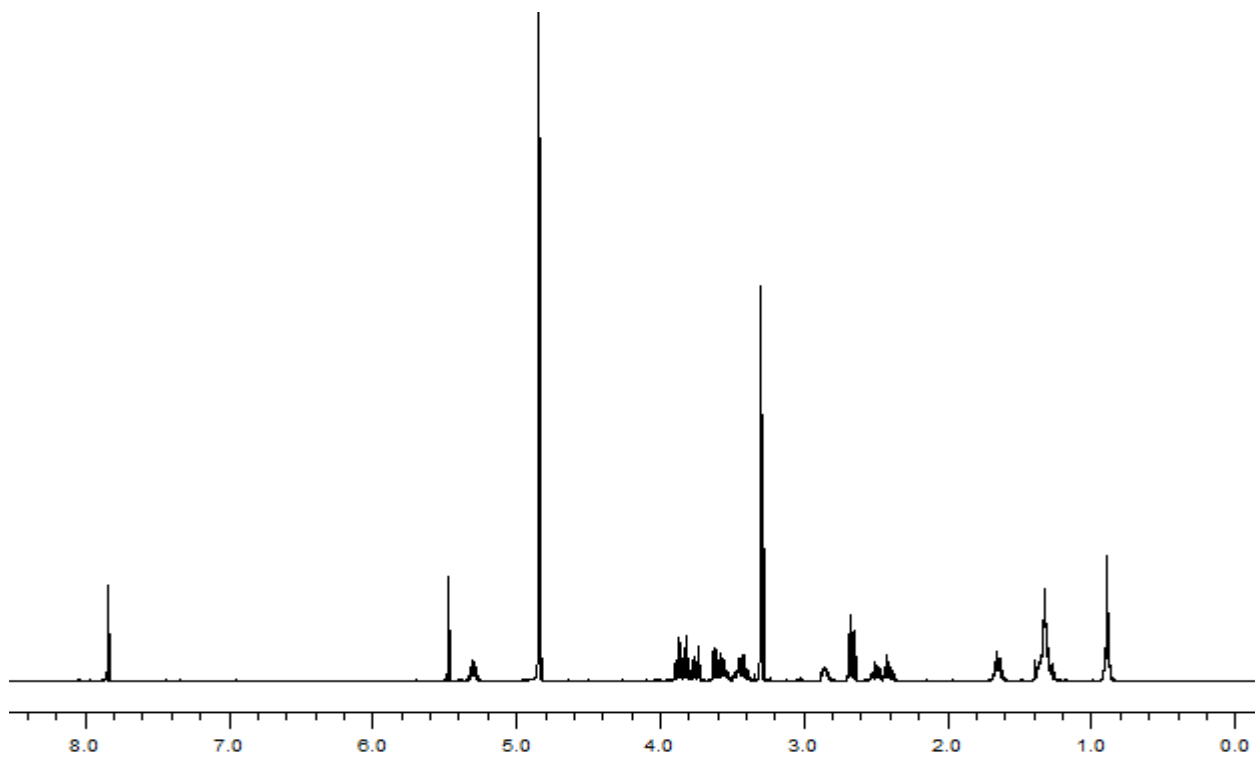

S17. <sup>1</sup>H-NMR spectrum of compound 8a (400 MHz, CD<sub>3</sub>OD).

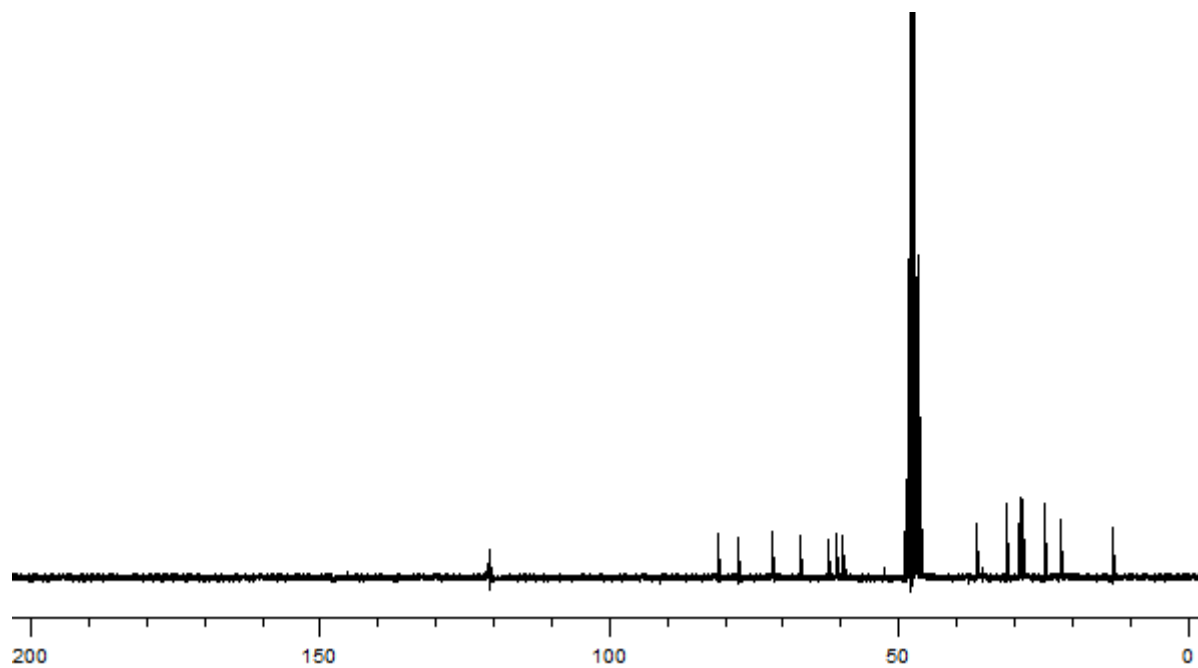

S18. <sup>13</sup>C-NMR spectrum of compound 8a (50 MHz, CD<sub>3</sub>OD).

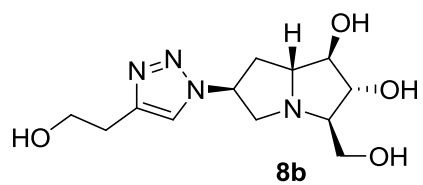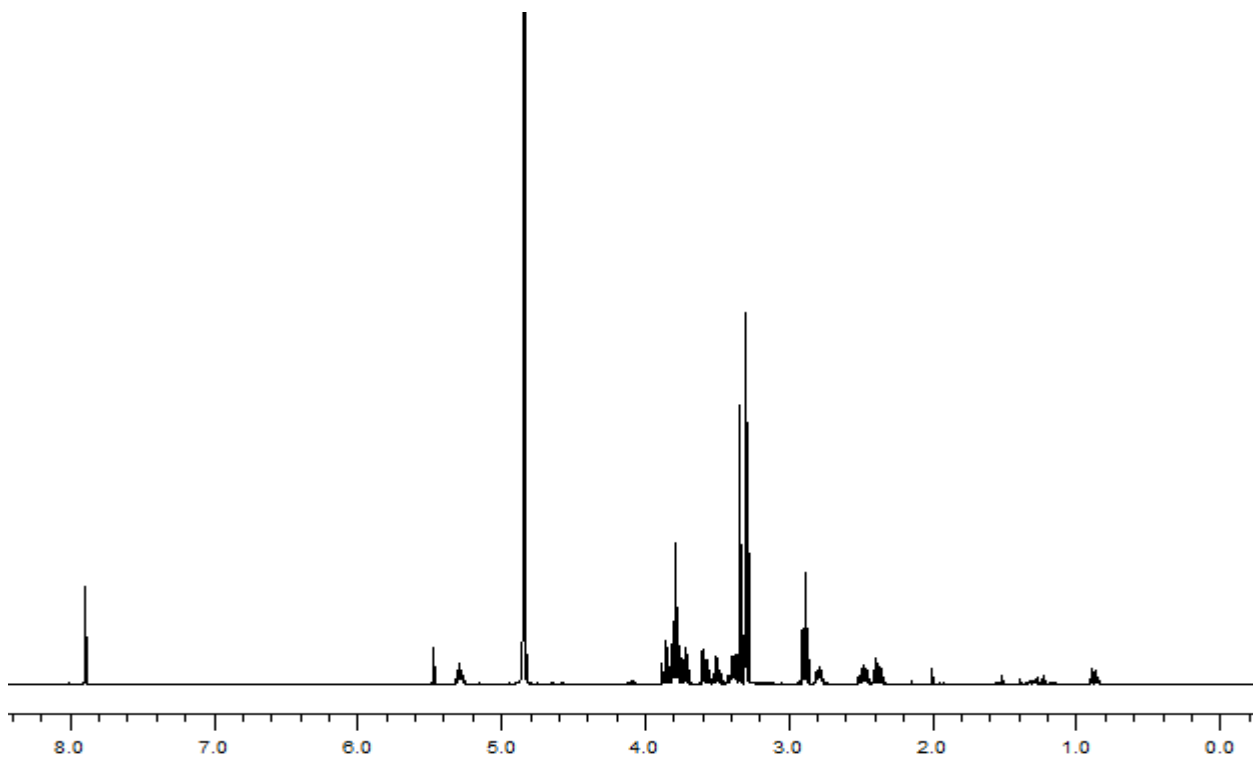

S19. <sup>1</sup>H-NMR spectrum of compound 8b (400 MHz, CD<sub>3</sub>OD).

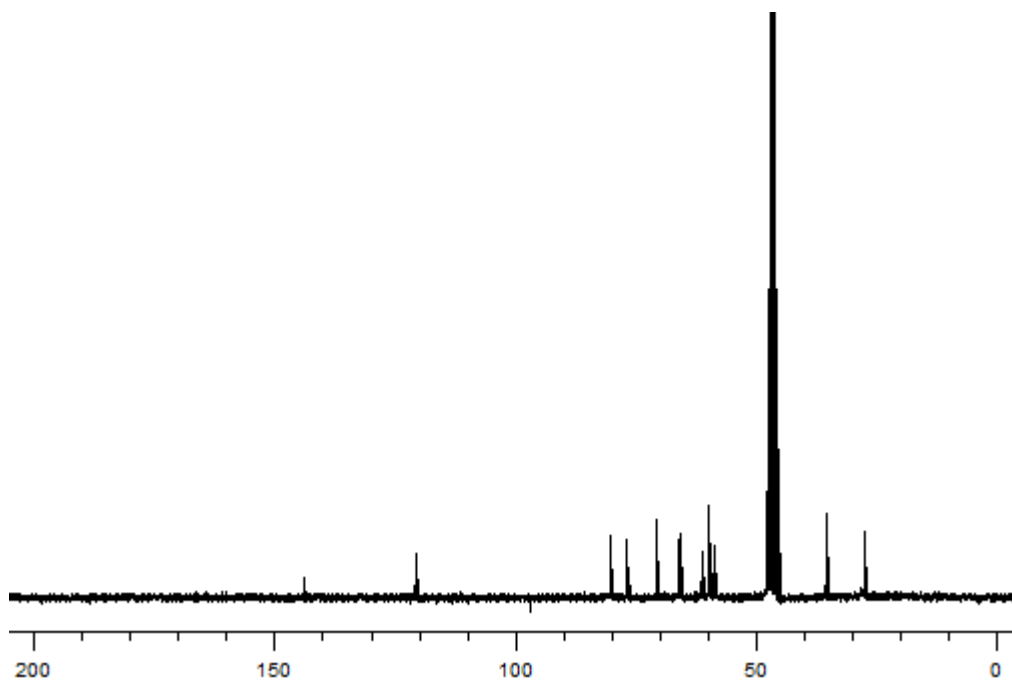

S20. <sup>13</sup>C-NMR spectrum of compound 8b (50 MHz, CD<sub>3</sub>OD).



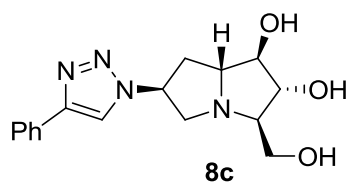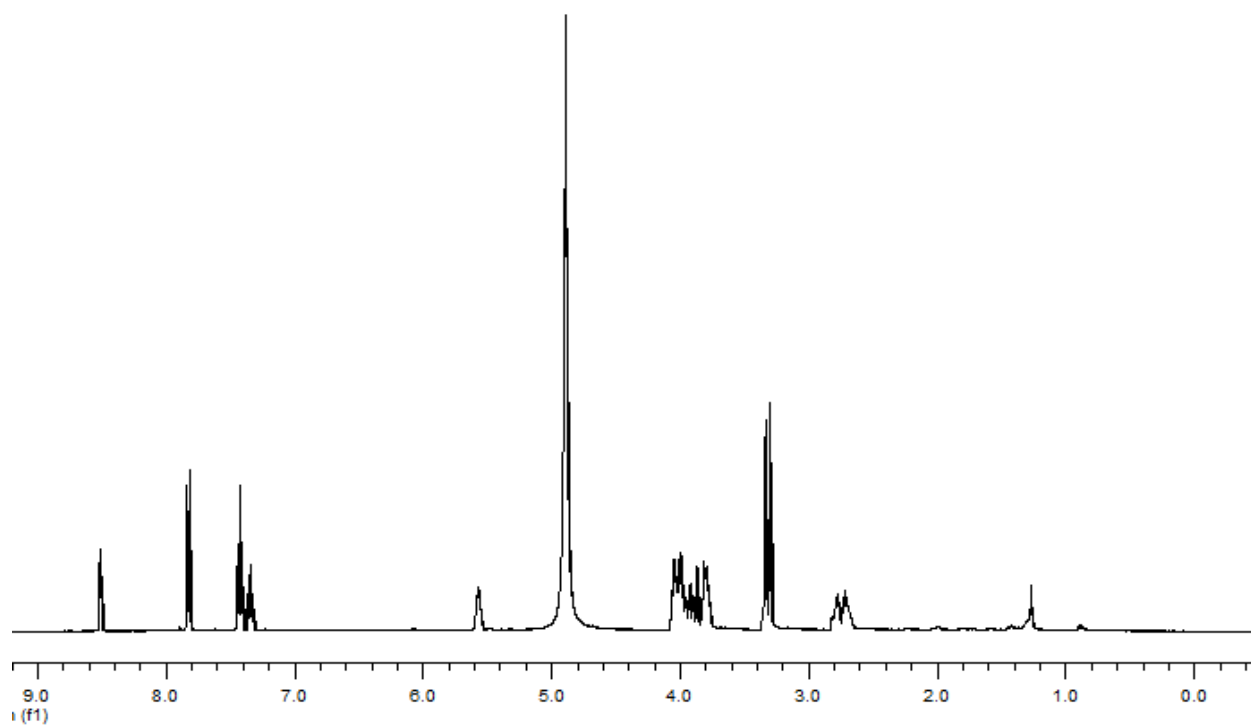

S21. <sup>1</sup>H-NMR spectrum of compound 8c (400 MHz, CD<sub>3</sub>OD).

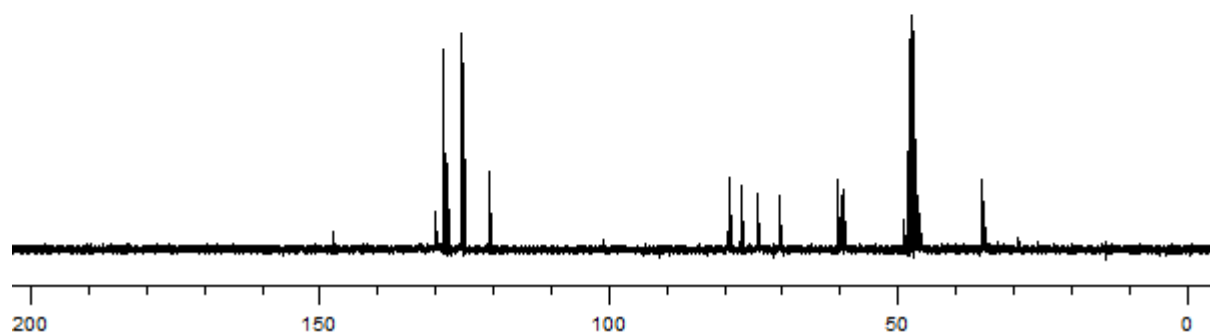

S22. <sup>13</sup>C-NMR spectrum of compound 8c (50 MHz, CD<sub>3</sub>OD).

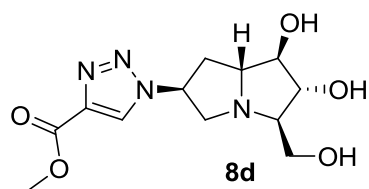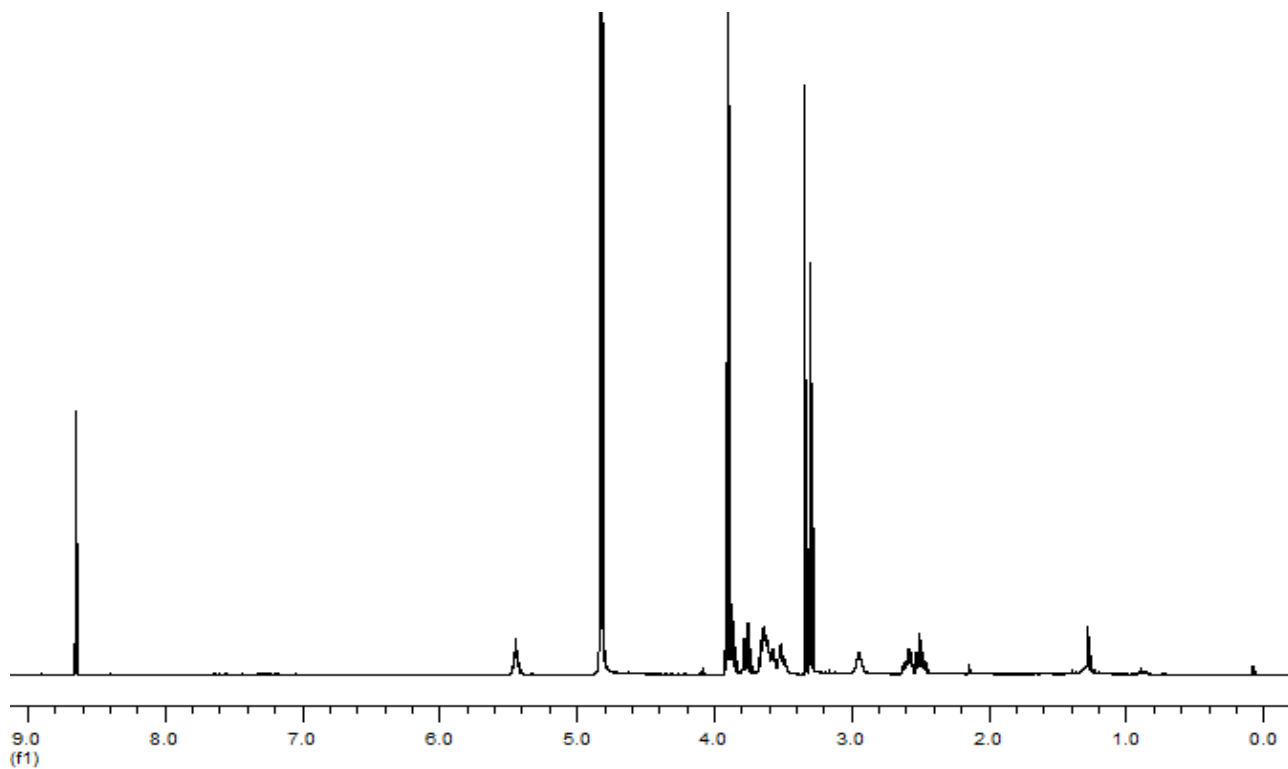

S23. <sup>1</sup>H-NMR spectrum of compound 8d (400 MHz, CD<sub>3</sub>OD).

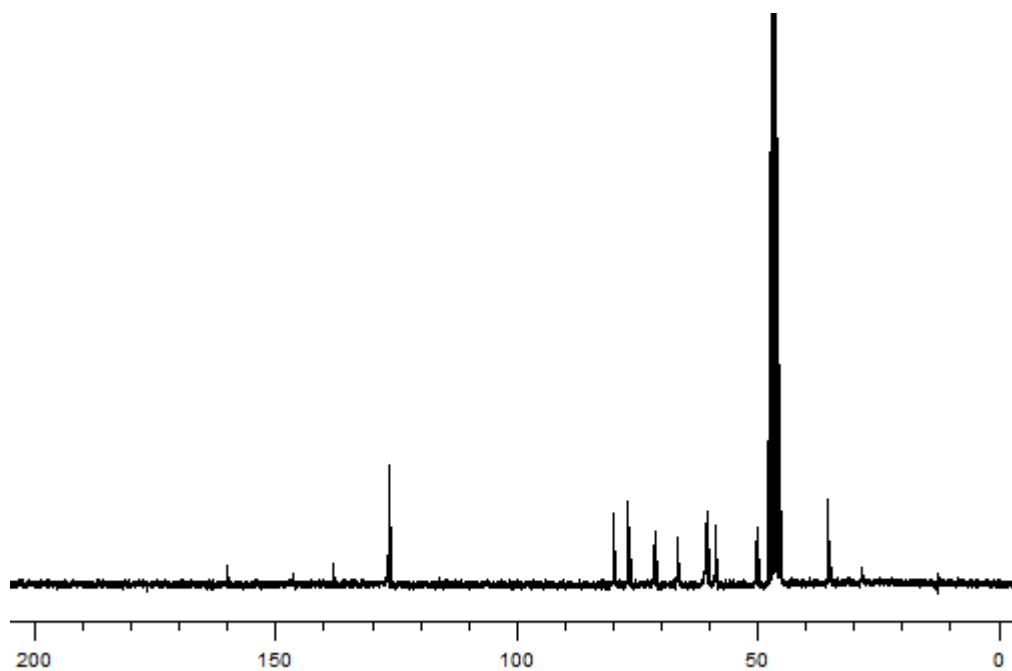

S24. <sup>13</sup>C-NMR spectrum of compound 8d (50 MHz, CD<sub>3</sub>OD).

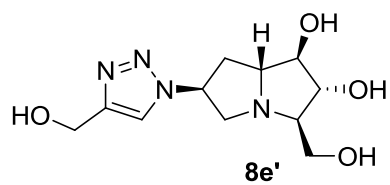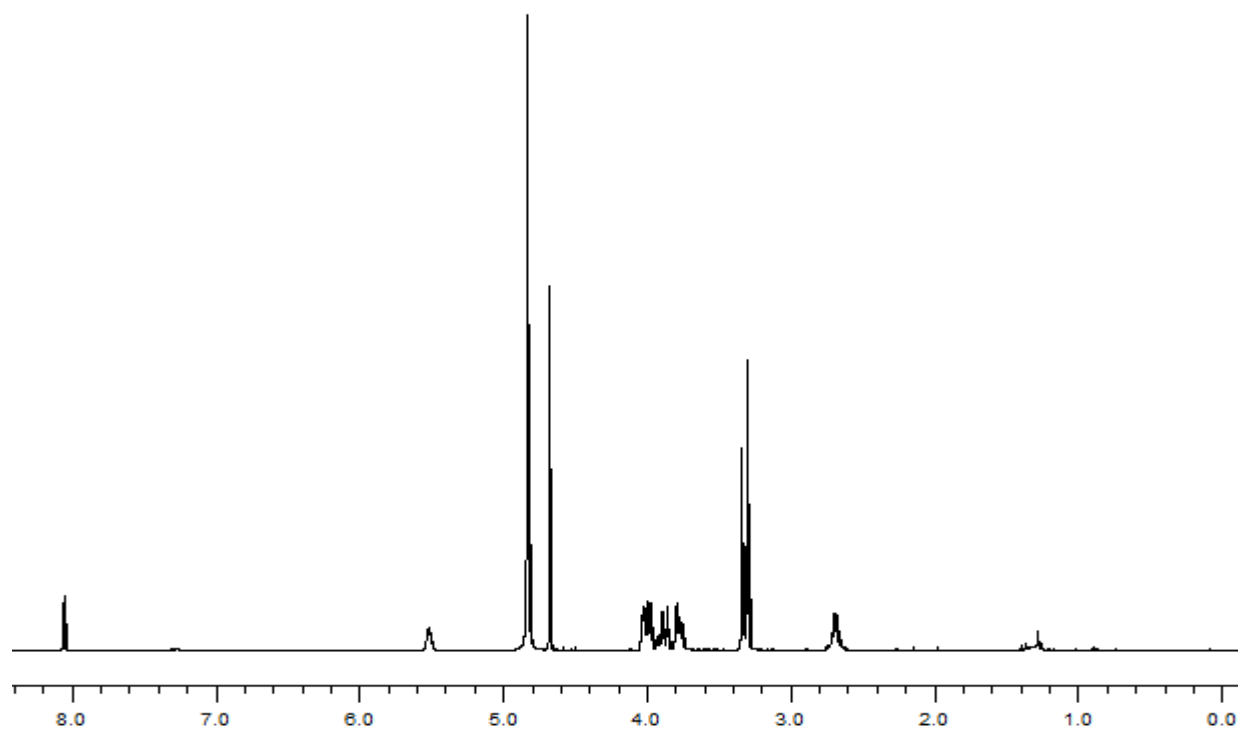

S25. <sup>1</sup>H-NMR spectrum of compound 8e' (400 MHz, CD<sub>3</sub>OD).

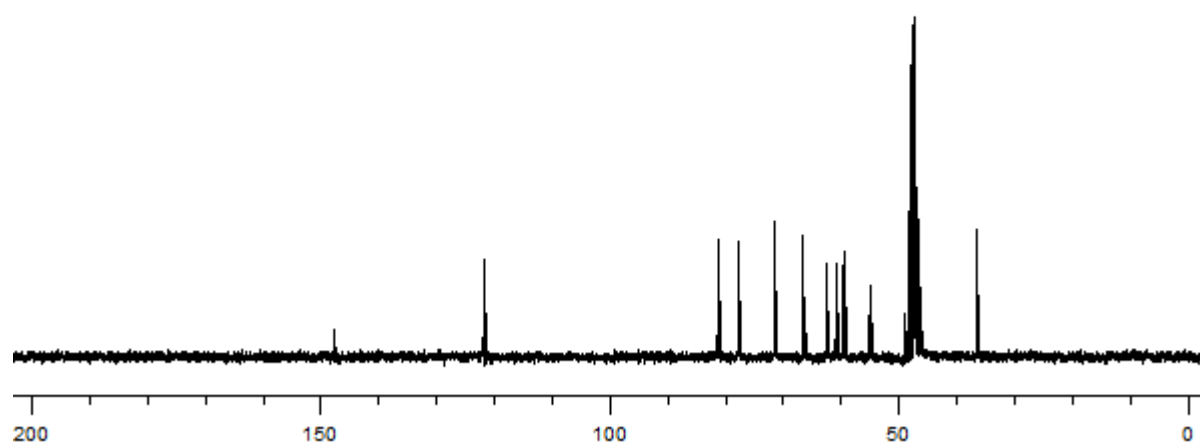

S26. <sup>13</sup>C-NMR spectrum of compound 8e' (50 MHz, CD<sub>3</sub>OD).

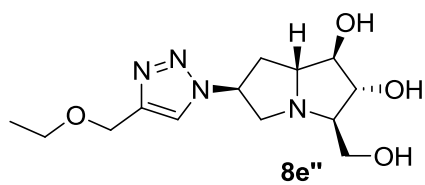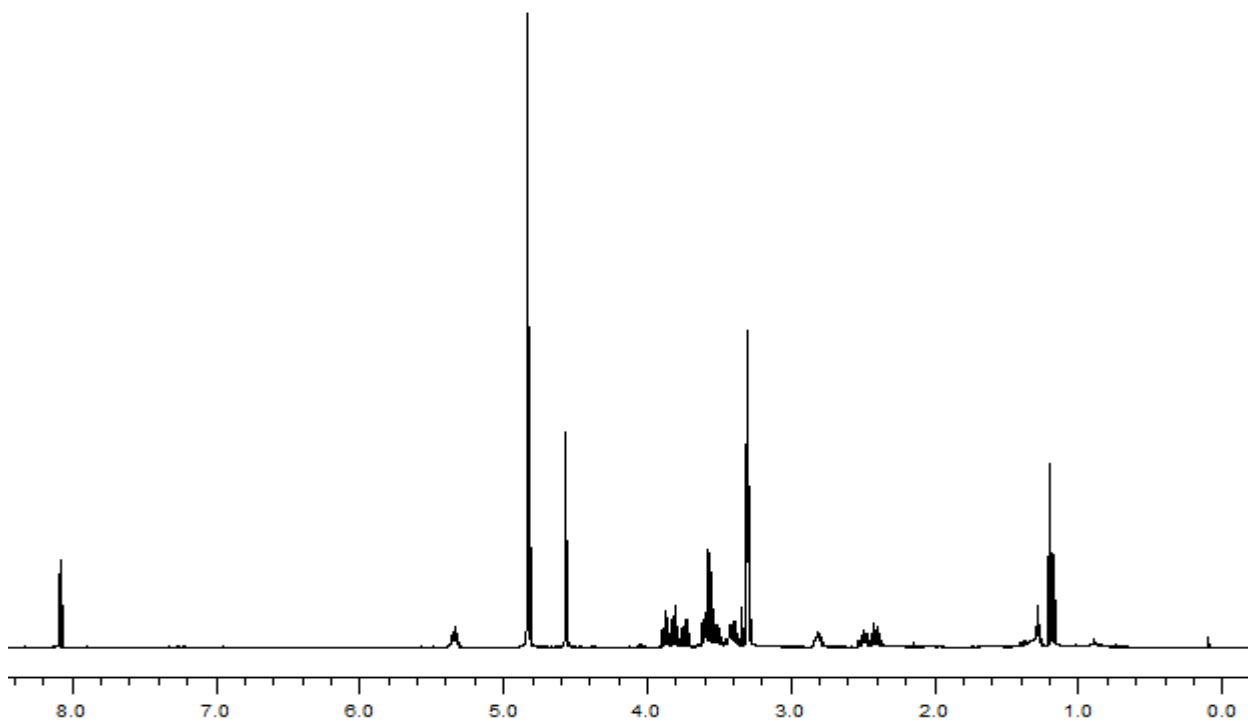

S27. <sup>1</sup>H-NMR spectrum of compound 8e'' (400 MHz, CD<sub>3</sub>OD).

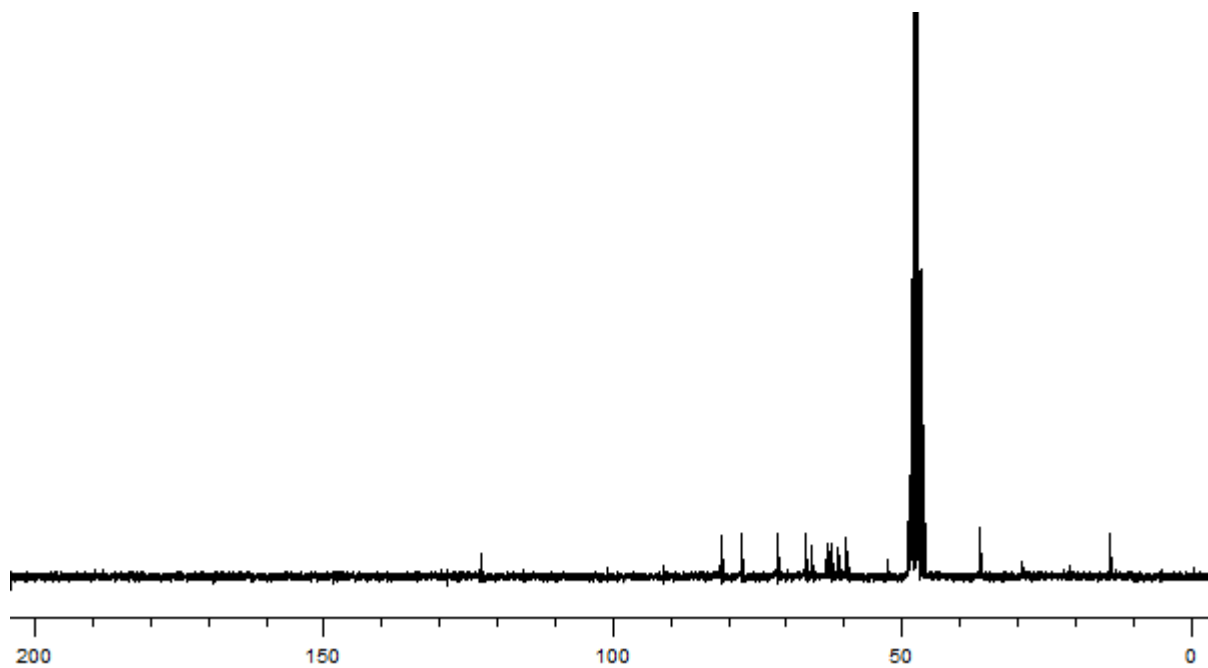

S28. <sup>13</sup>C-NMR spectrum of compound 8e'' (50 MHz, CD<sub>3</sub>OD).

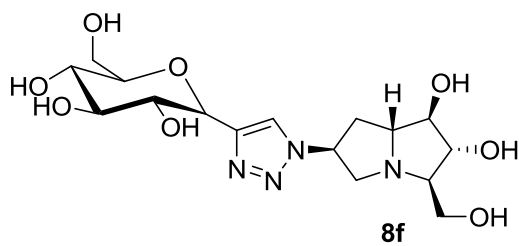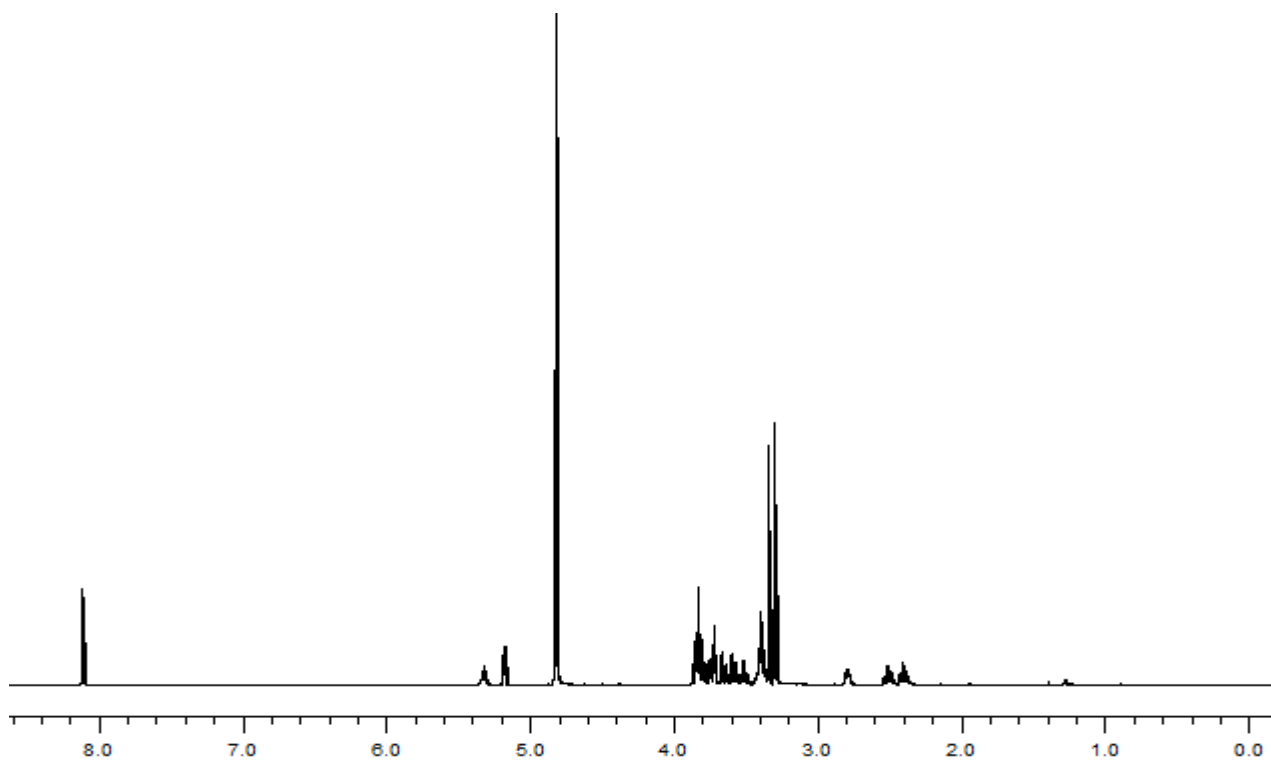

S29. <sup>1</sup>H-NMR spectrum of compound 8f (400 MHz, CD<sub>3</sub>OD).

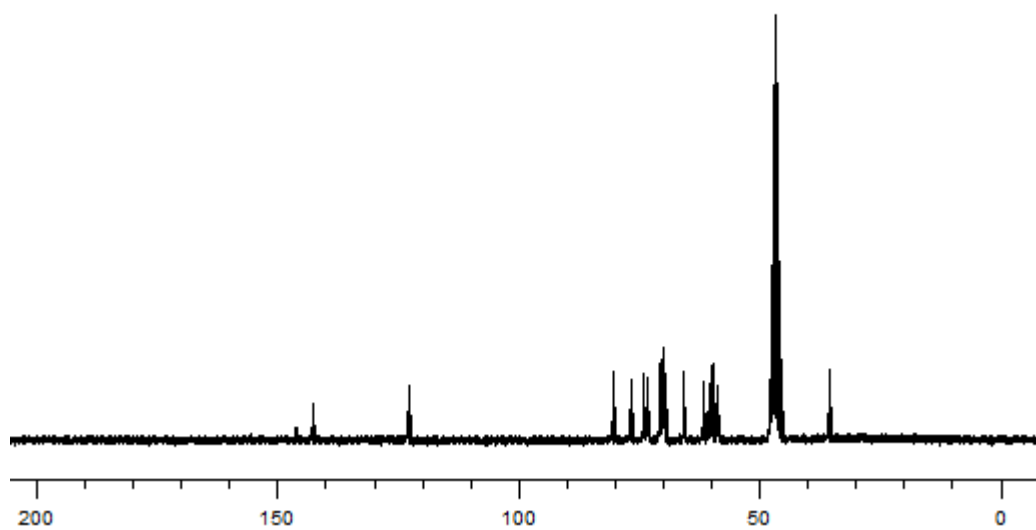

S30. <sup>13</sup>C-NMR spectrum of compound 8f (50 MHz, CD<sub>3</sub>OD).

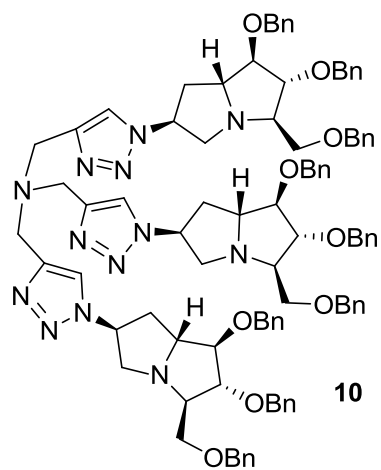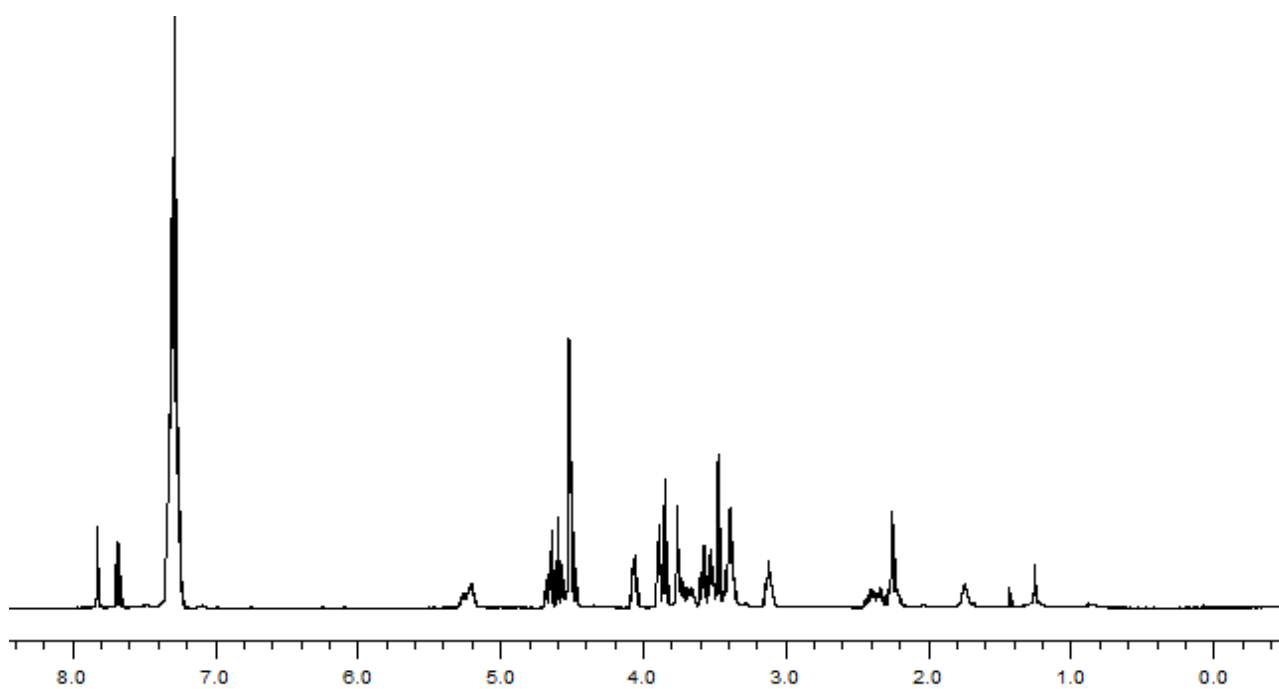

S31.  $^1\text{H-NMR}$  spectrum of compound 10 (400 MHz,  $\text{CDCl}_3$ ).

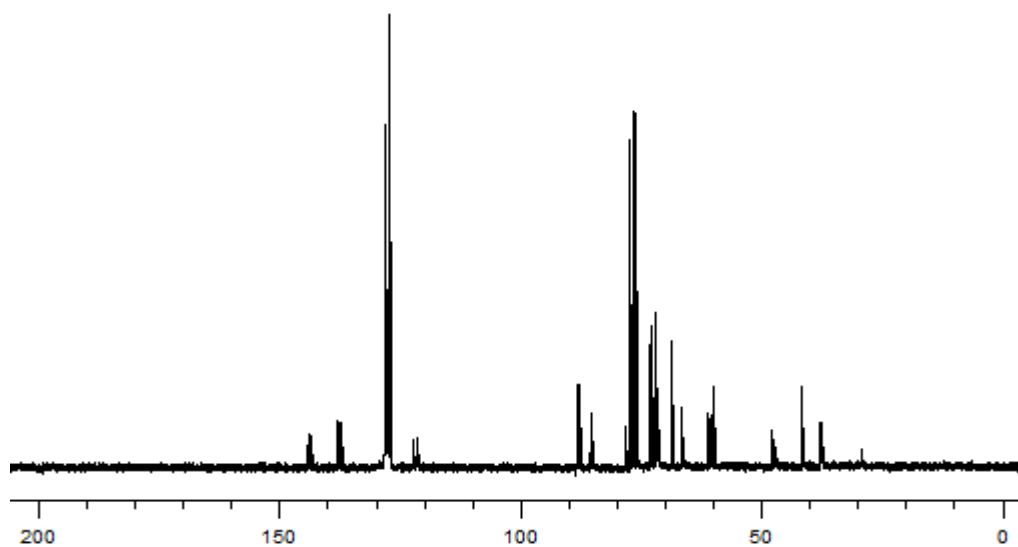

S32.  $^{13}\text{C-NMR}$  spectrum of compound 10 (50 MHz,  $\text{CDCl}_3$ ).

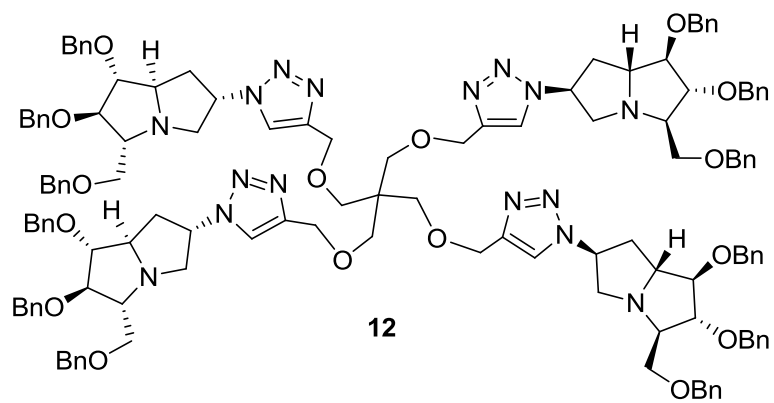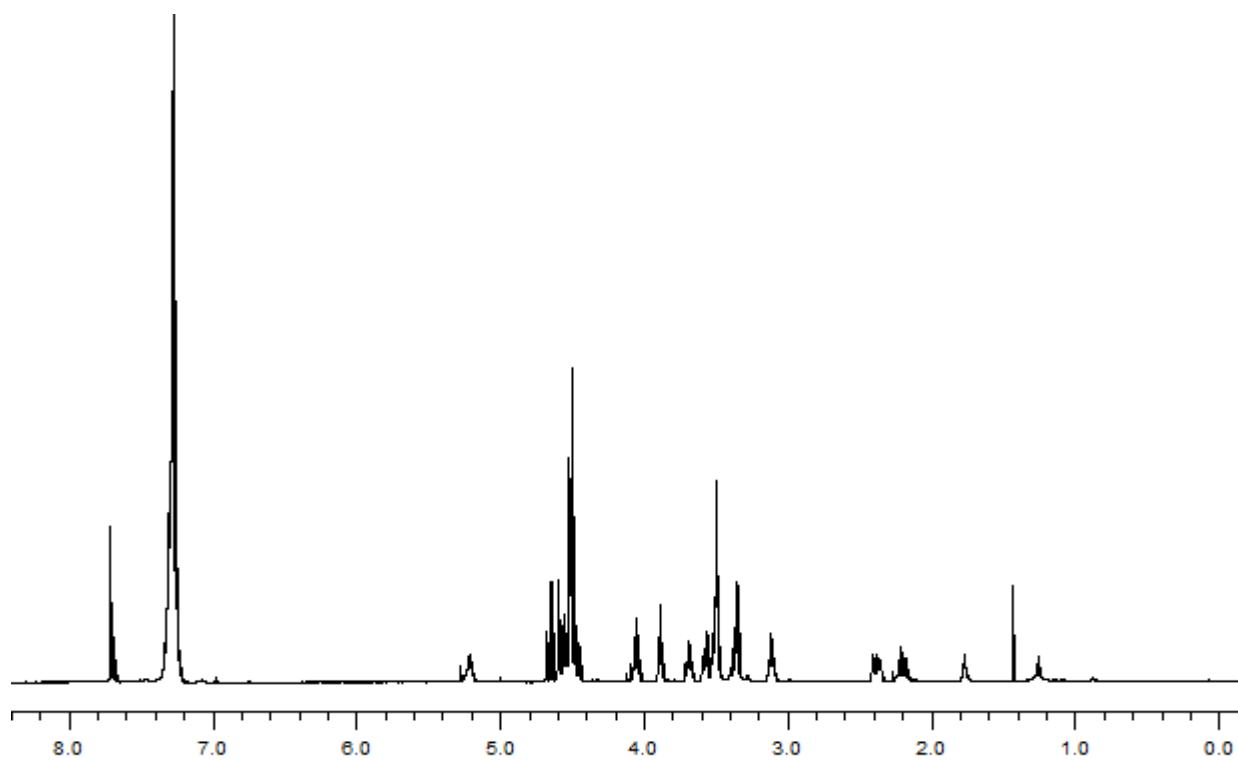

S33.  $^1\text{H-NMR}$  spectrum of compound 12 (400 MHz,  $\text{CDCl}_3$ ).

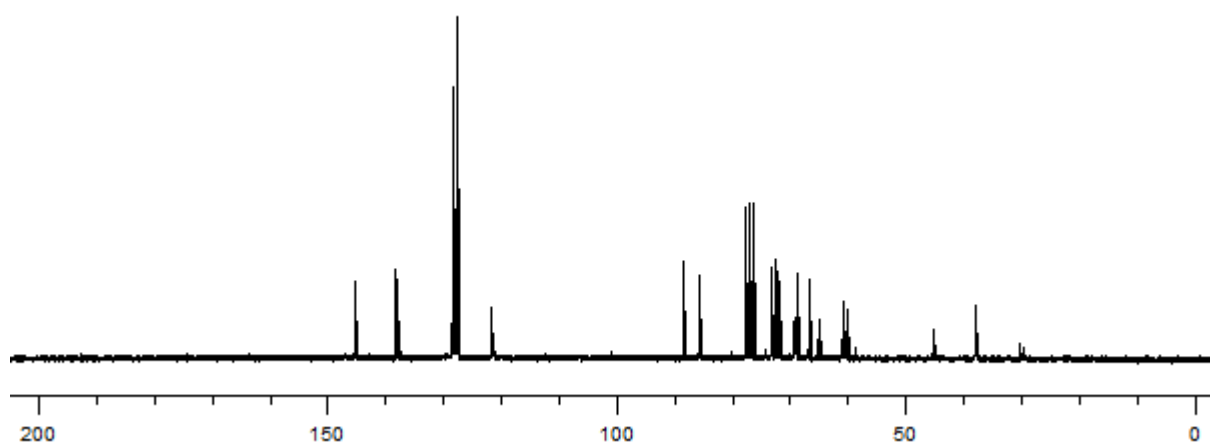

S34.  $^{13}\text{C-NMR}$  spectrum of compound 12 (50 MHz,  $\text{CDCl}_3$ ).

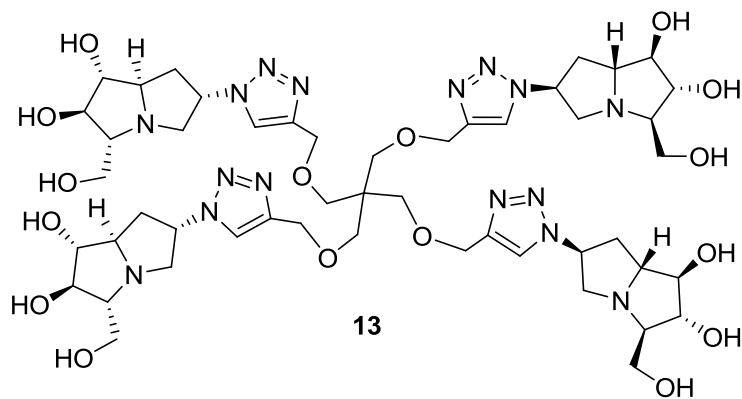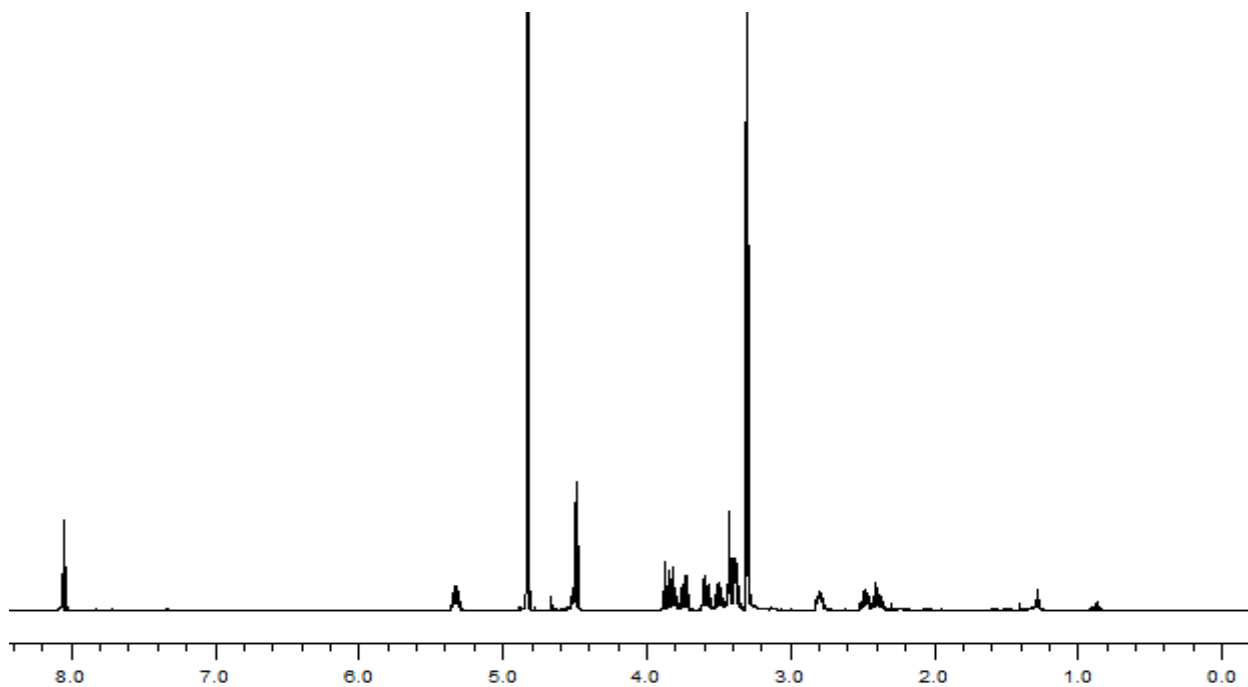

S35.  $^1\text{H-NMR}$  spectrum of compound 13 (400 MHz,  $\text{CD}_3\text{OD}$ ).

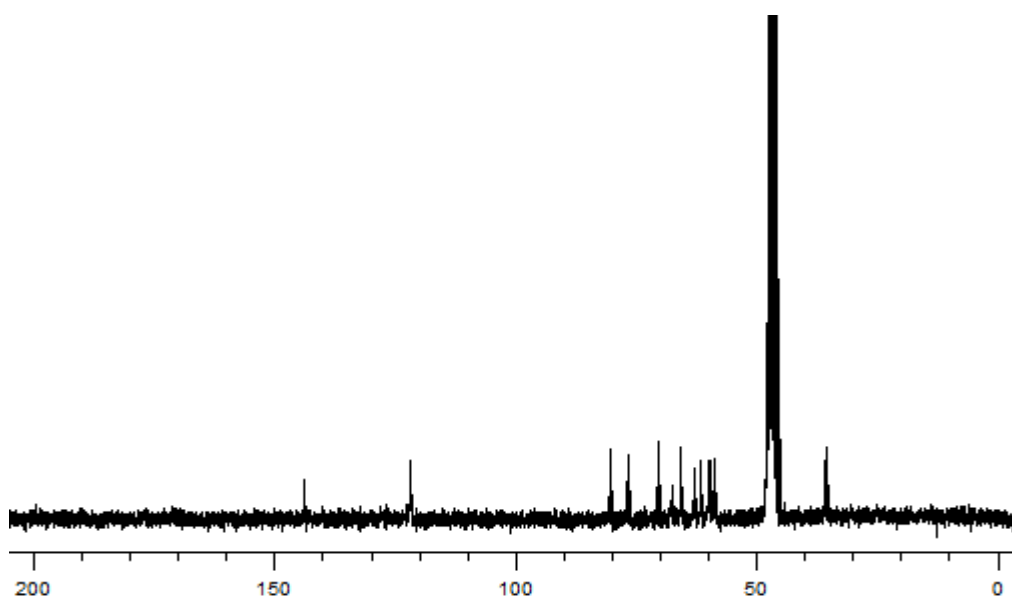

S36.  $^{13}\text{C-NMR}$  spectrum of compound 13 (50 MHz,  $\text{CD}_3\text{OD}$ ).



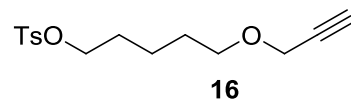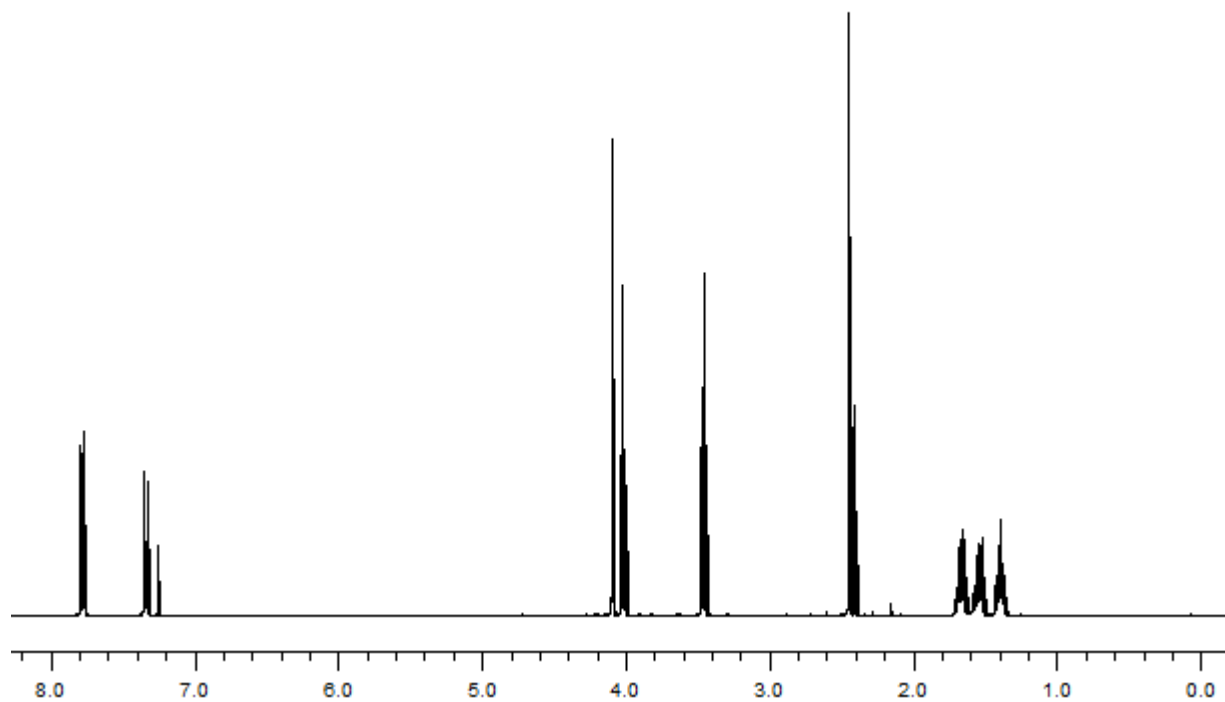

S37. <sup>1</sup>H-NMR spectrum of compound 16 (400 MHz, CDCl<sub>3</sub>).

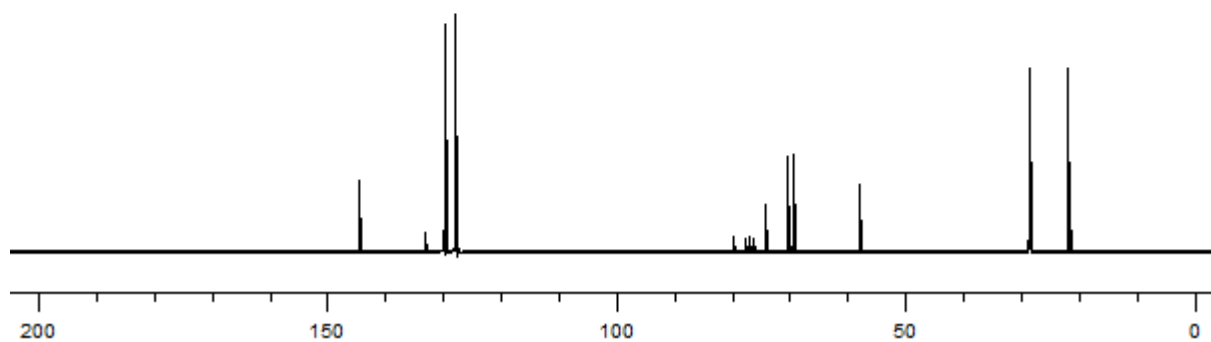

S38. <sup>13</sup>C-NMR spectrum of compound 16 (50 MHz, CDCl<sub>3</sub>).

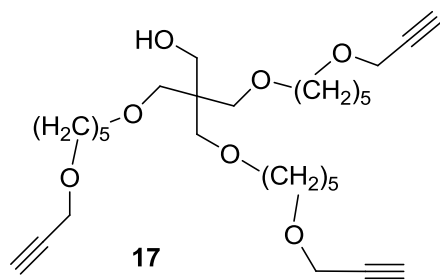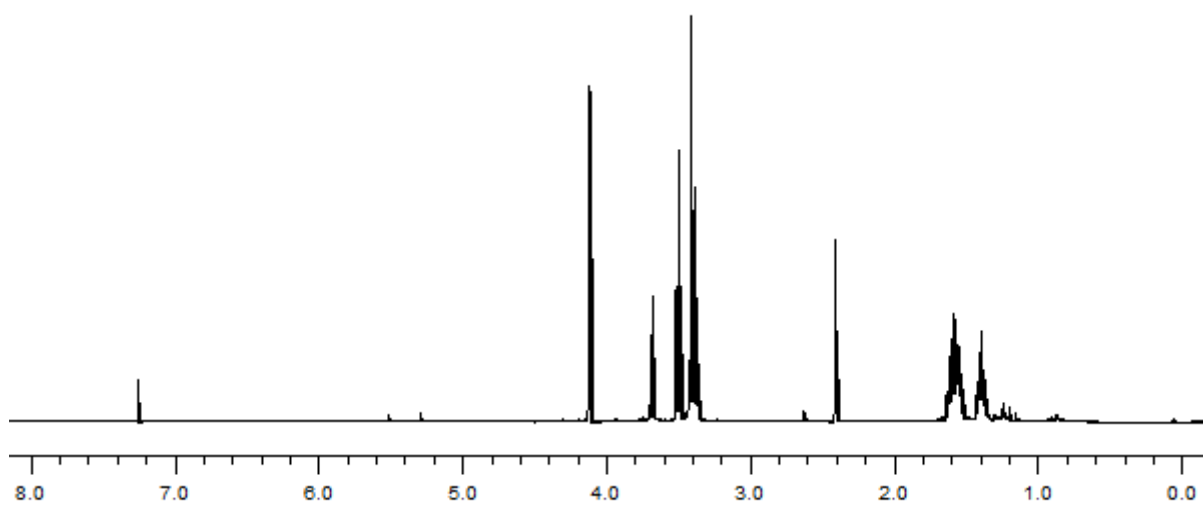

S39.  $^1\text{H-NMR}$  spectrum of compound 17 (400 MHz,  $\text{CDCl}_3$ ).

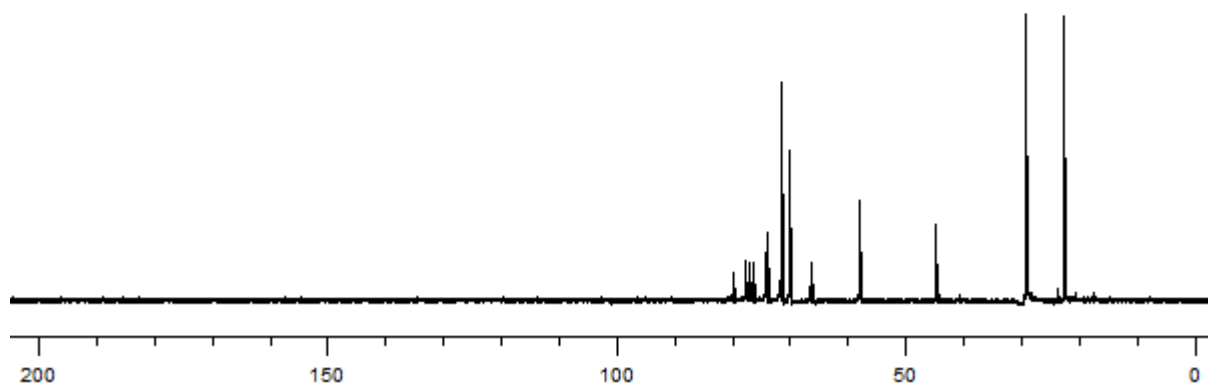

S40.  $^{13}\text{C-NMR}$  spectrum of compound 17 (50 MHz,  $\text{CDCl}_3$ ).

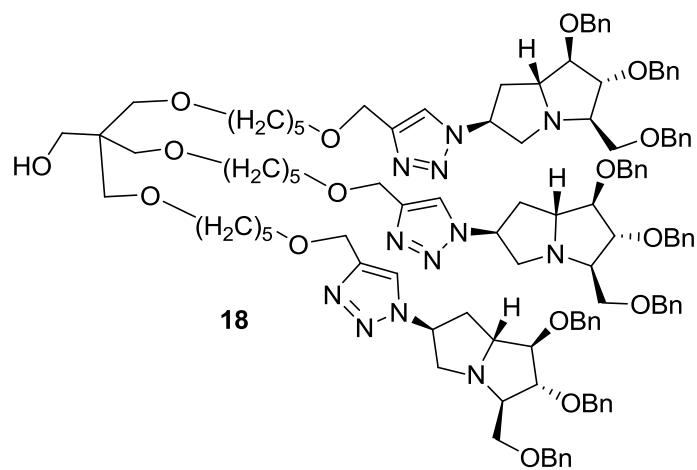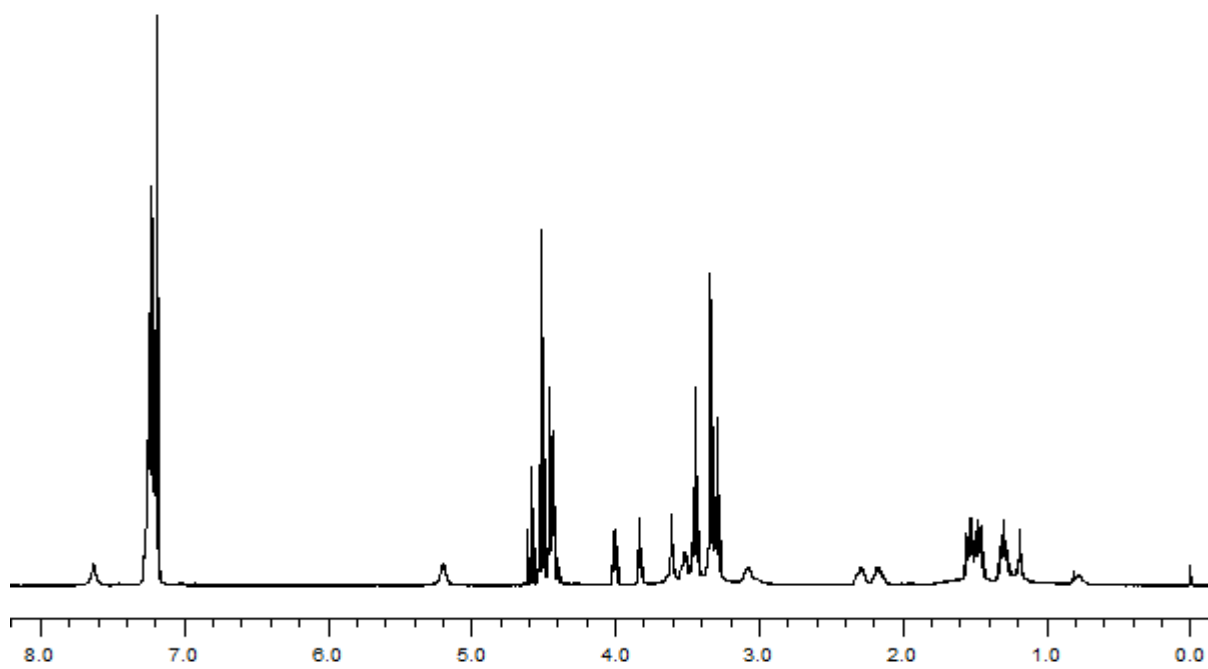

**S41.**  $^1\text{H}$ -NMR spectrum of compound **18** (400 MHz,  $\text{CDCl}_3$ ).

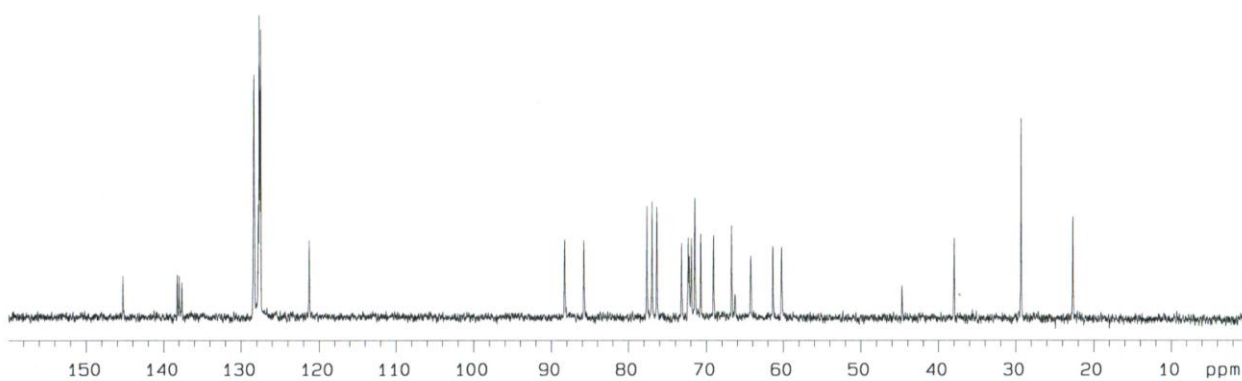

**S42.**  $^{13}\text{C}$ -NMR spectrum of compound **18** (50 MHz,  $\text{CDCl}_3$ ).

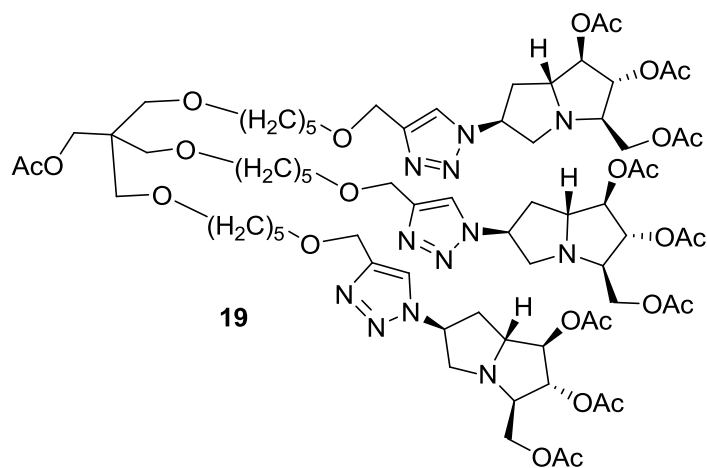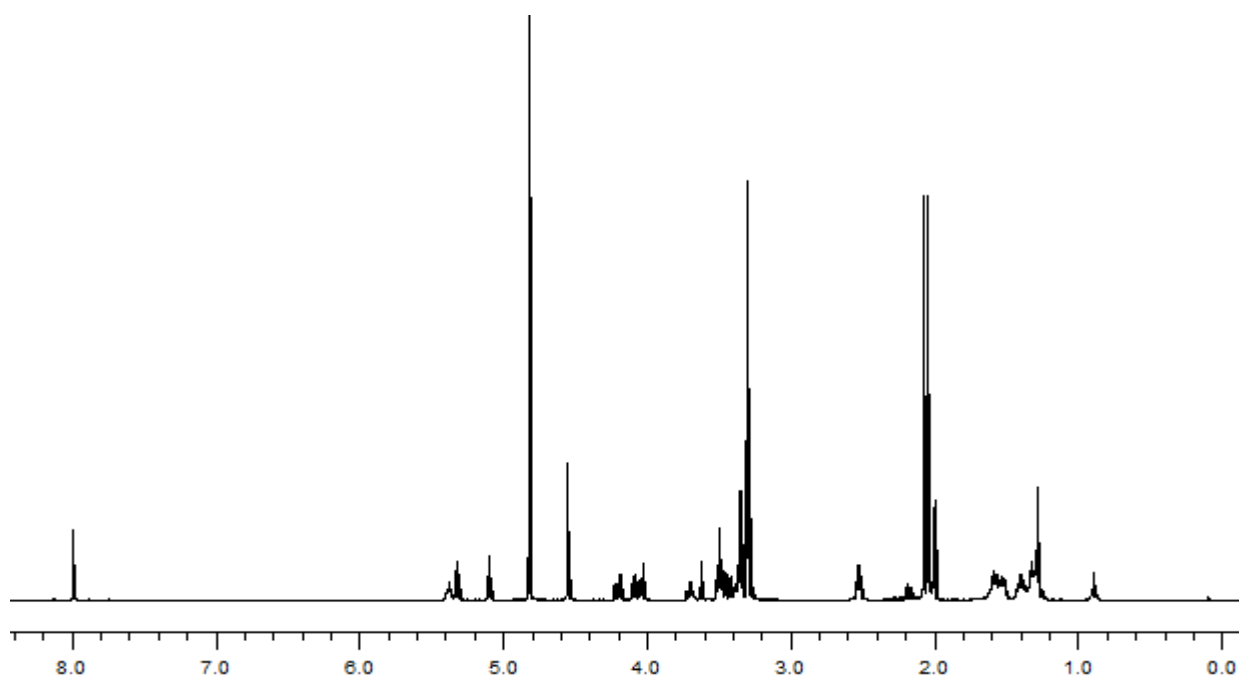

S43. <sup>1</sup>H-NMR spectrum of compound 19 (400 MHz, CD<sub>3</sub>OD).

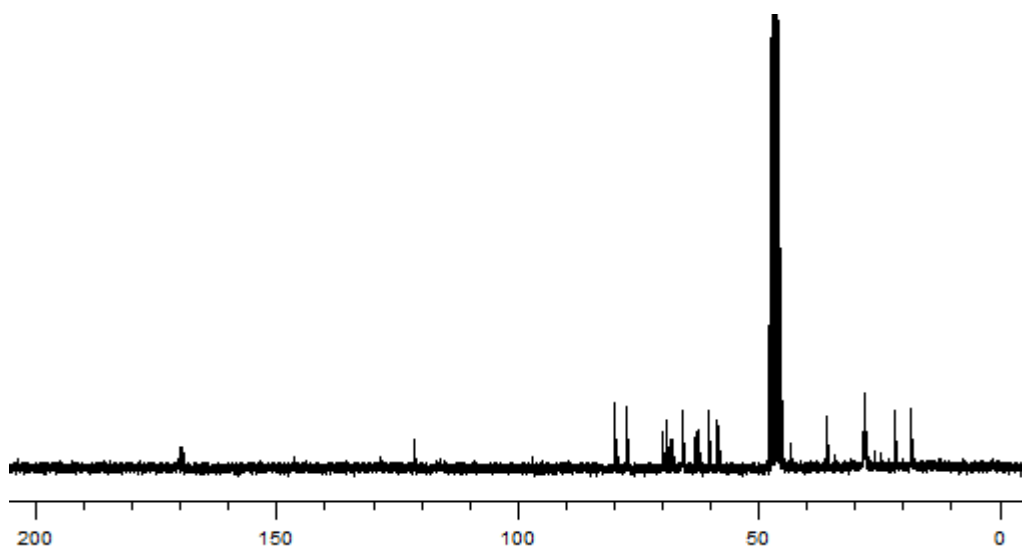

S44. <sup>13</sup>C-NMR spectrum of compound 19 (50 MHz, CD<sub>3</sub>OD).

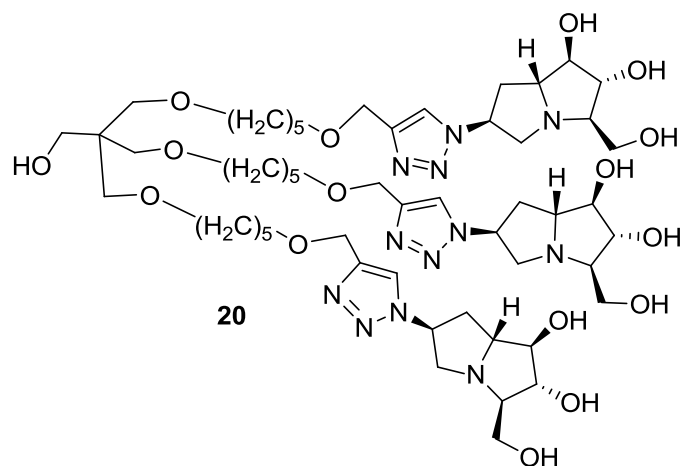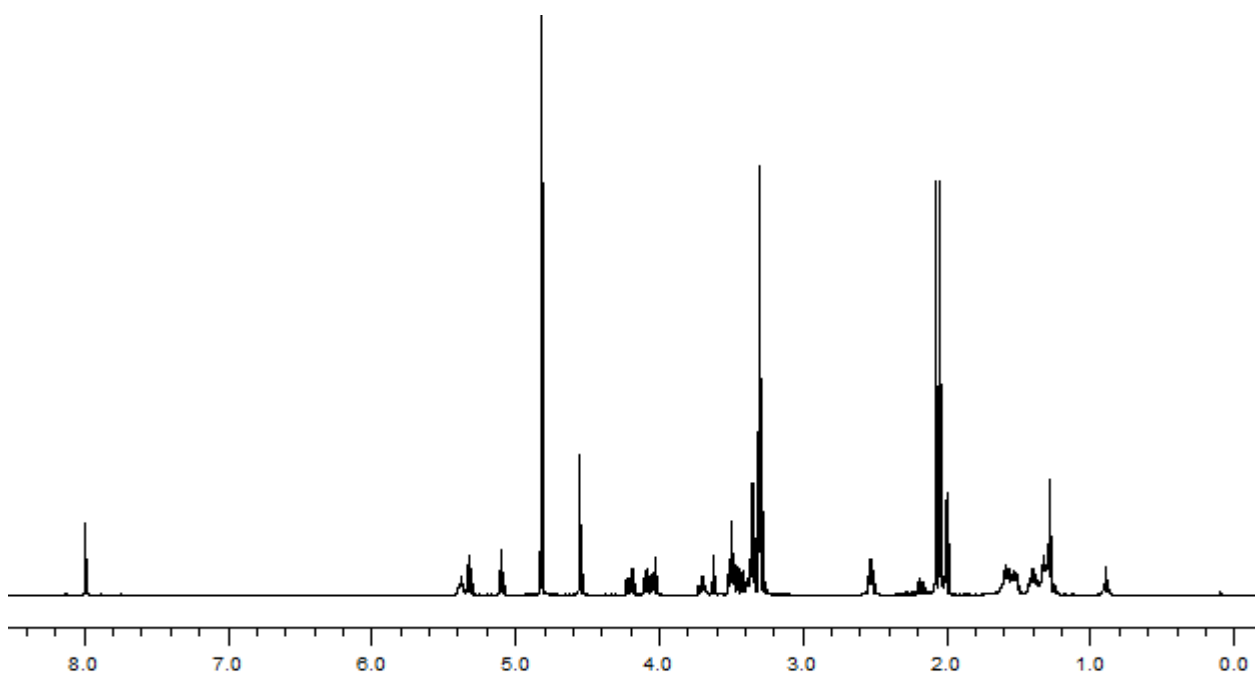

S45.  $^1\text{H}$ -NMR spectrum of compound 20 (400 MHz,  $\text{CD}_3\text{OD}$ ).

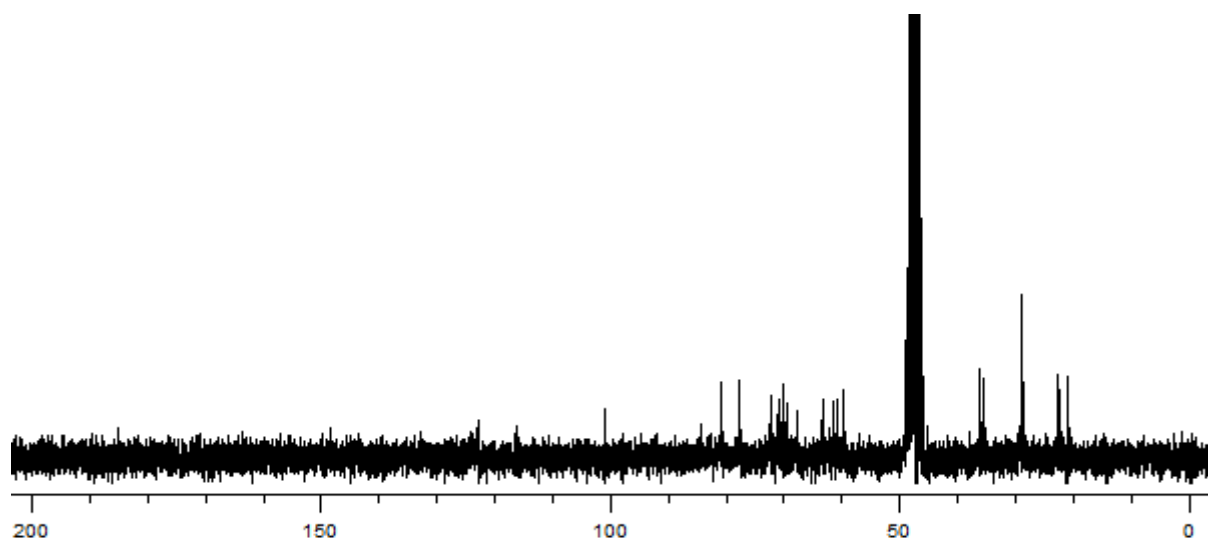

S46.  $^{13}\text{C}$ -NMR spectrum of compound 20 (50 MHz,  $\text{CD}_3\text{OD}$ ).

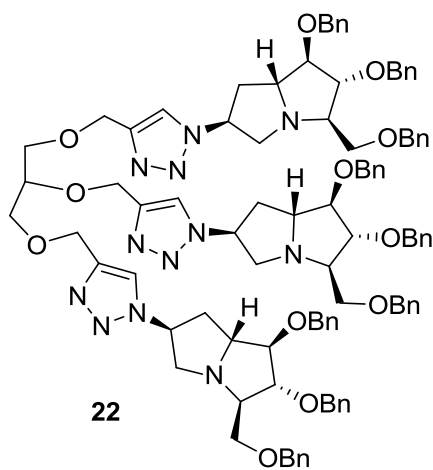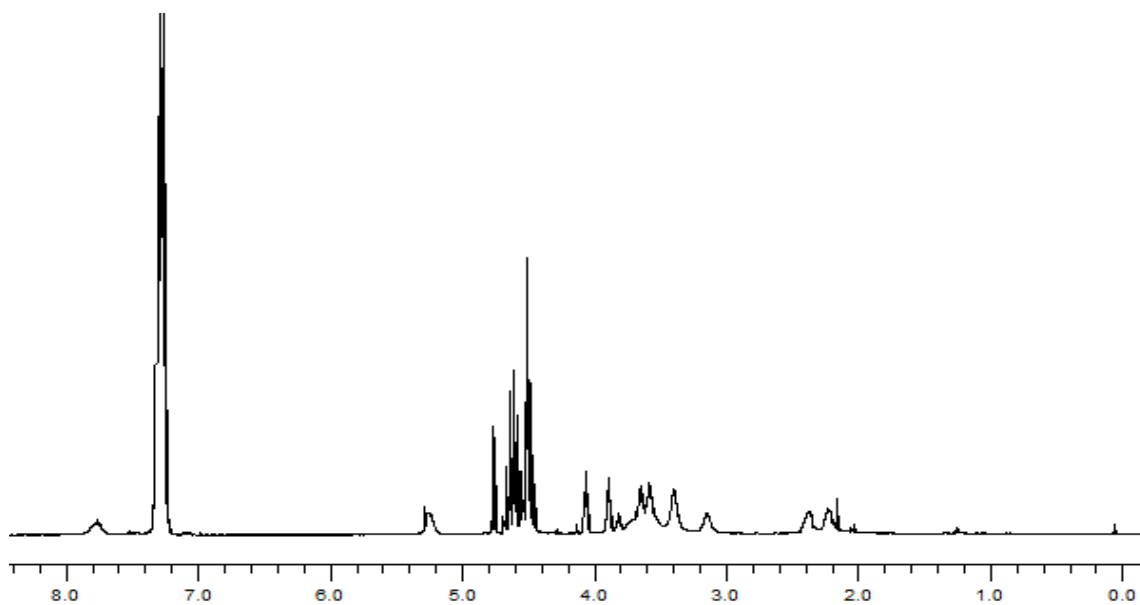

S47.  $^1\text{H}$ -NMR spectrum of compound 22 (400 MHz,  $\text{CDCl}_3$ ).

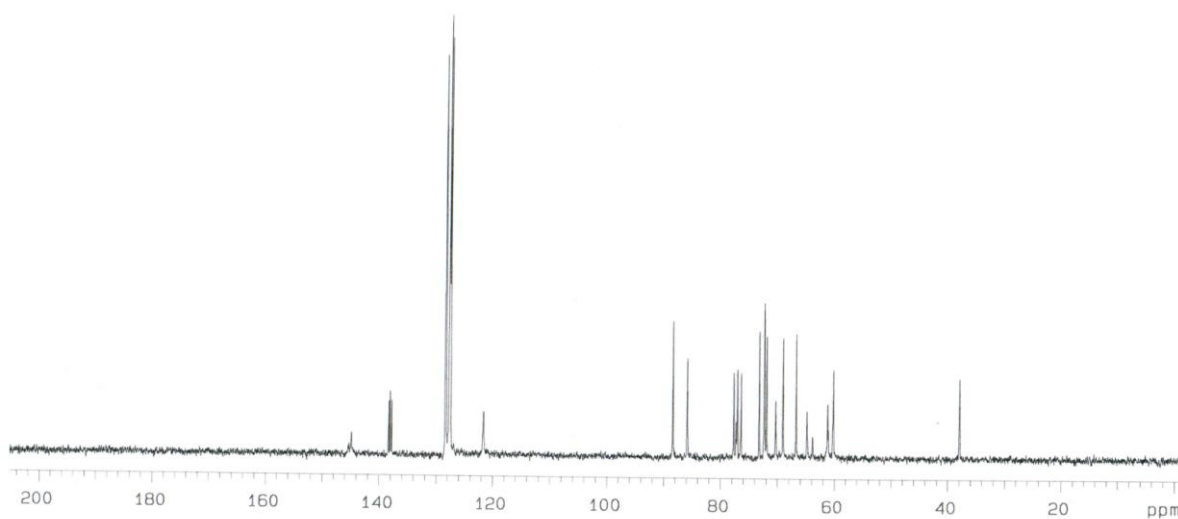

S48.  $^{13}\text{C}$ -NMR spectrum of compound 22 (50 MHz,  $\text{CDCl}_3$ ).

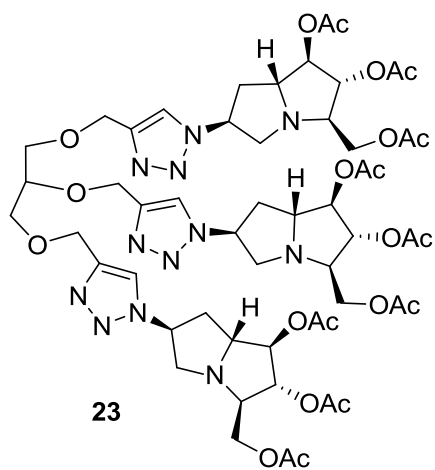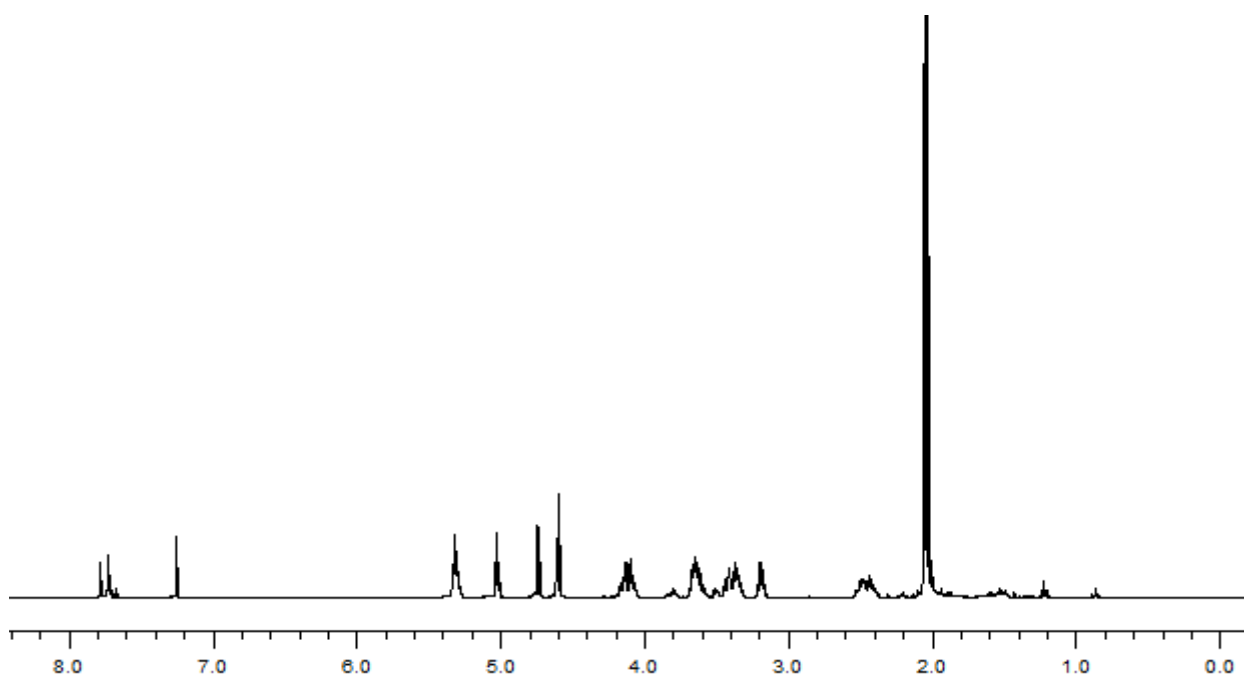

S49.  $^1\text{H}$ -NMR spectrum of compound 23 (400 MHz,  $\text{CDCl}_3$ ).

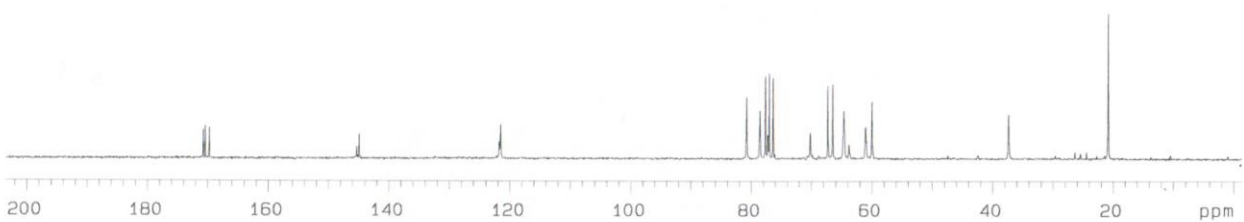

S50.  $^{13}\text{C}$ -NMR spectrum of compound 23 (50 MHz,  $\text{CDCl}_3$ ).

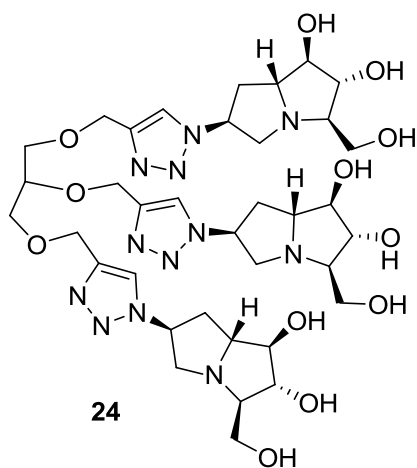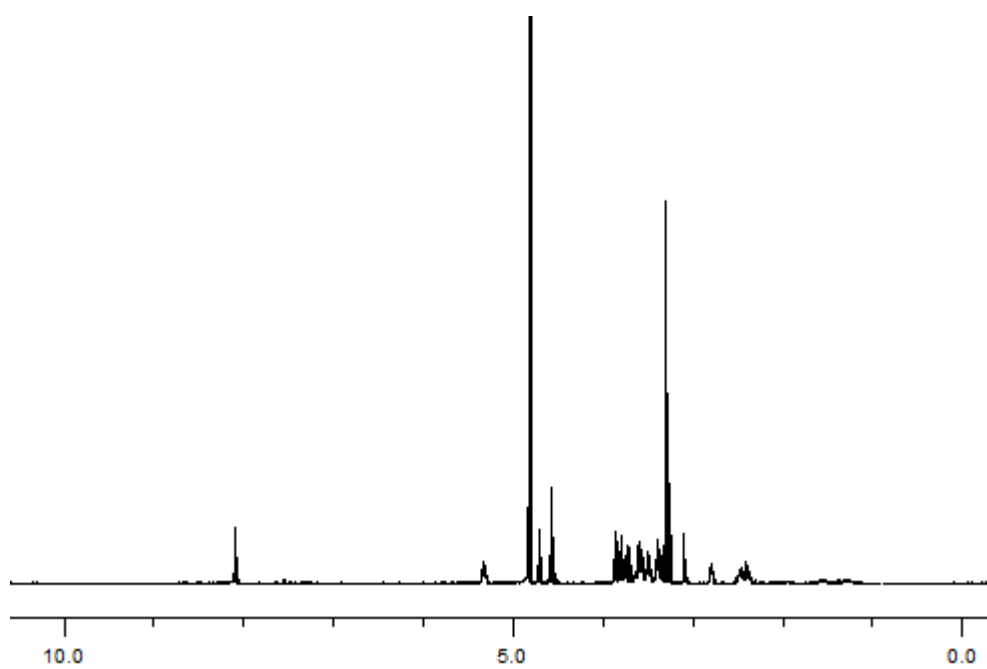

S51.  $^1\text{H-NMR}$  spectrum of compound 24 (400 MHz,  $\text{CD}_3\text{OD}$ ).

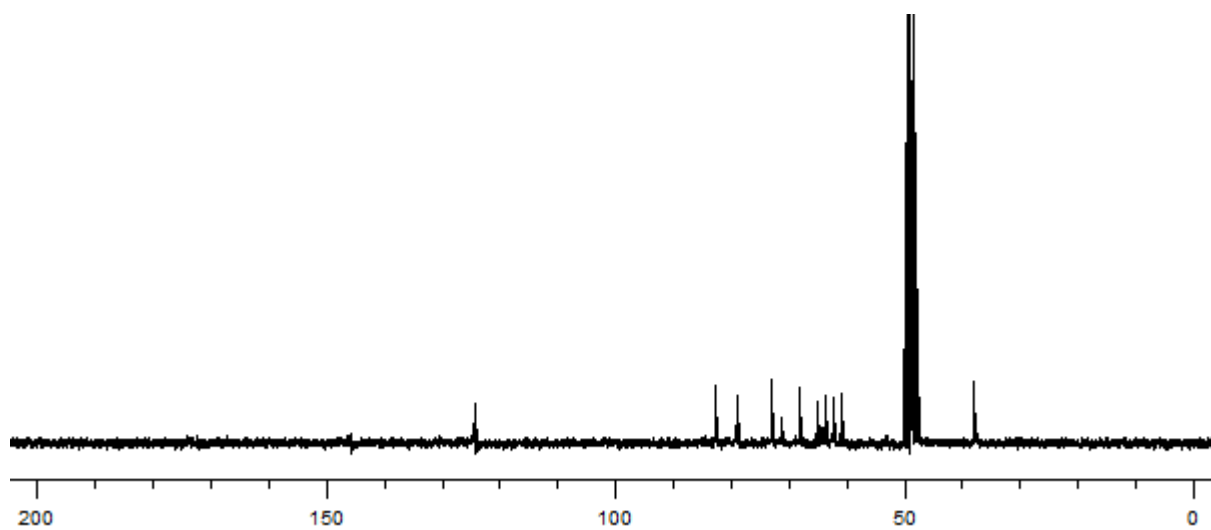

S52.  $^{13}\text{C-NMR}$  spectrum of compound 24 (50 MHz,  $\text{CD}_3\text{OD}$ ).



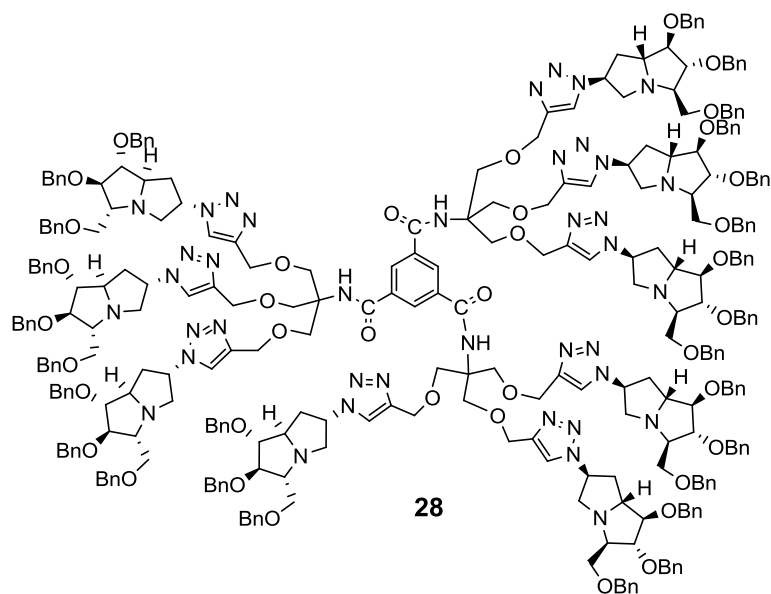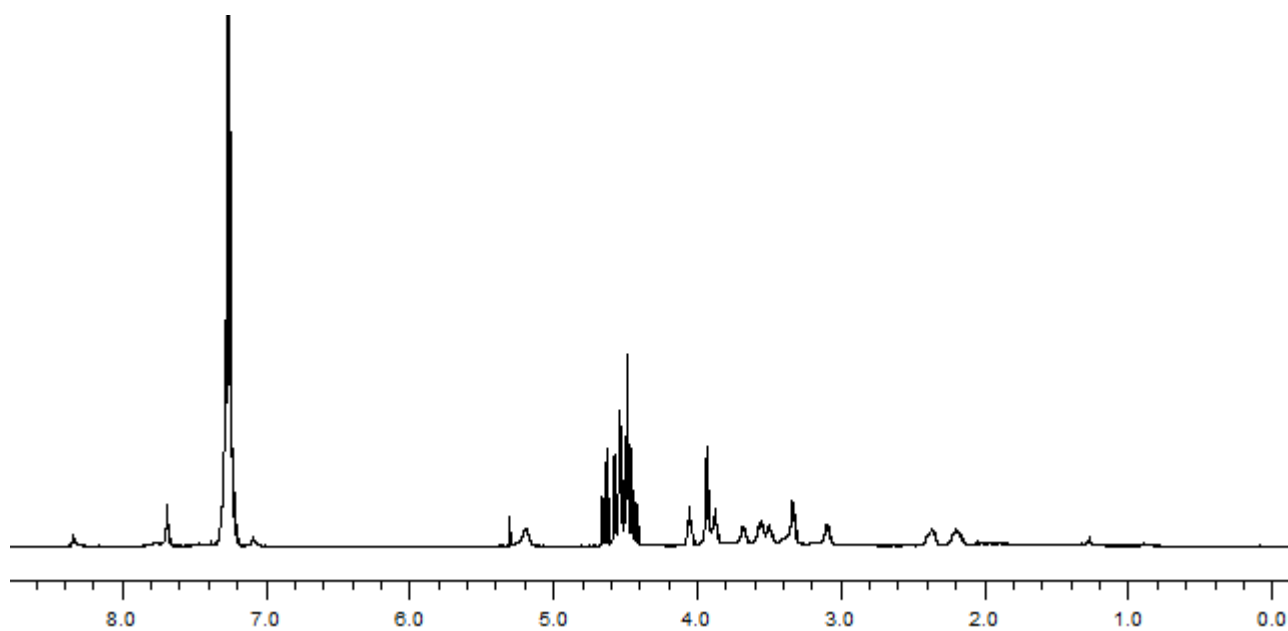

S53.  $^1\text{H-NMR}$  spectrum of compound **28** (400 MHz,  $\text{CDCl}_3$ ).

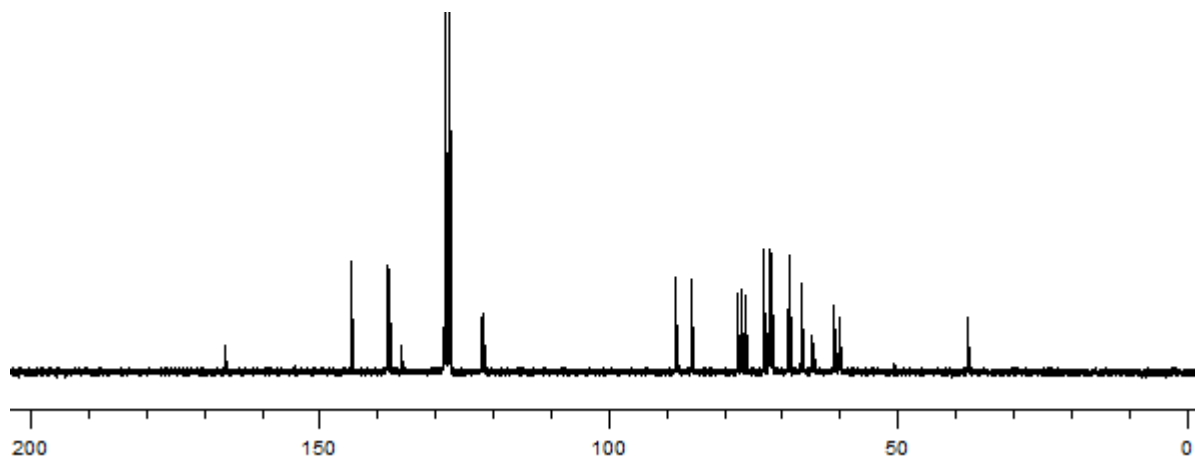

S54.  $^{13}\text{C-NMR}$  spectrum of compound **28** (50 MHz,  $\text{CDCl}_3$ ).

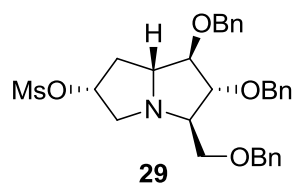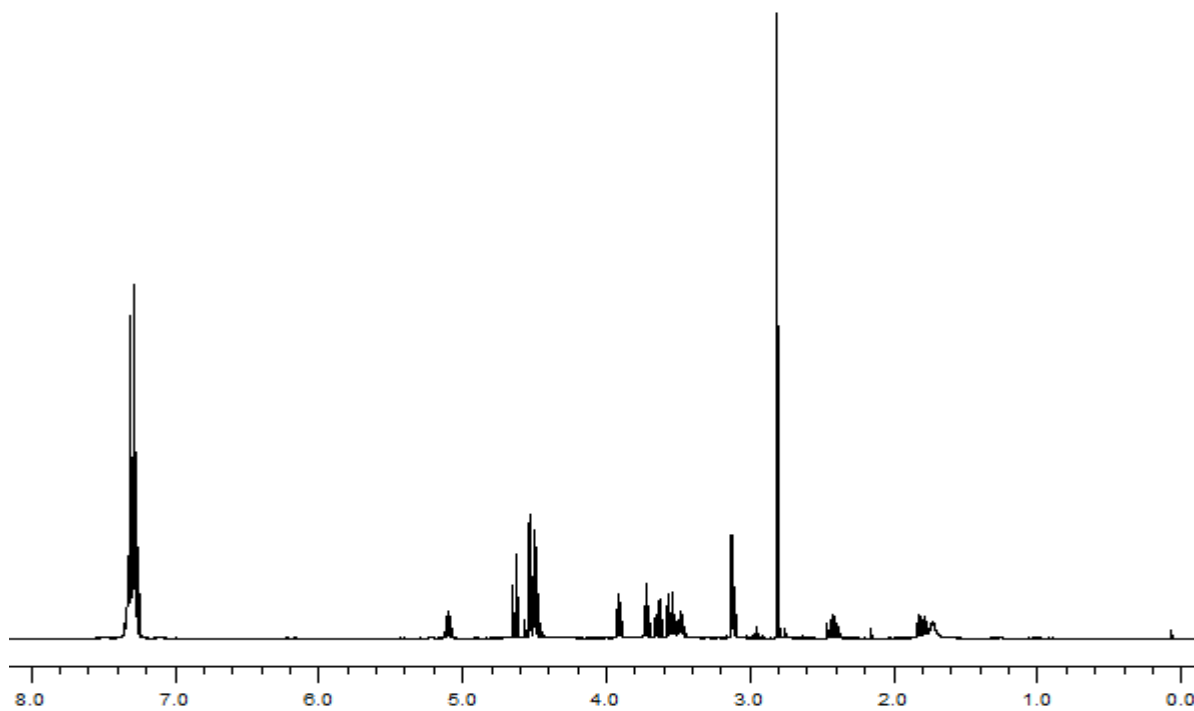

S55. <sup>1</sup>H-NMR spectrum of compound 29 (400 MHz, CDCl<sub>3</sub>).

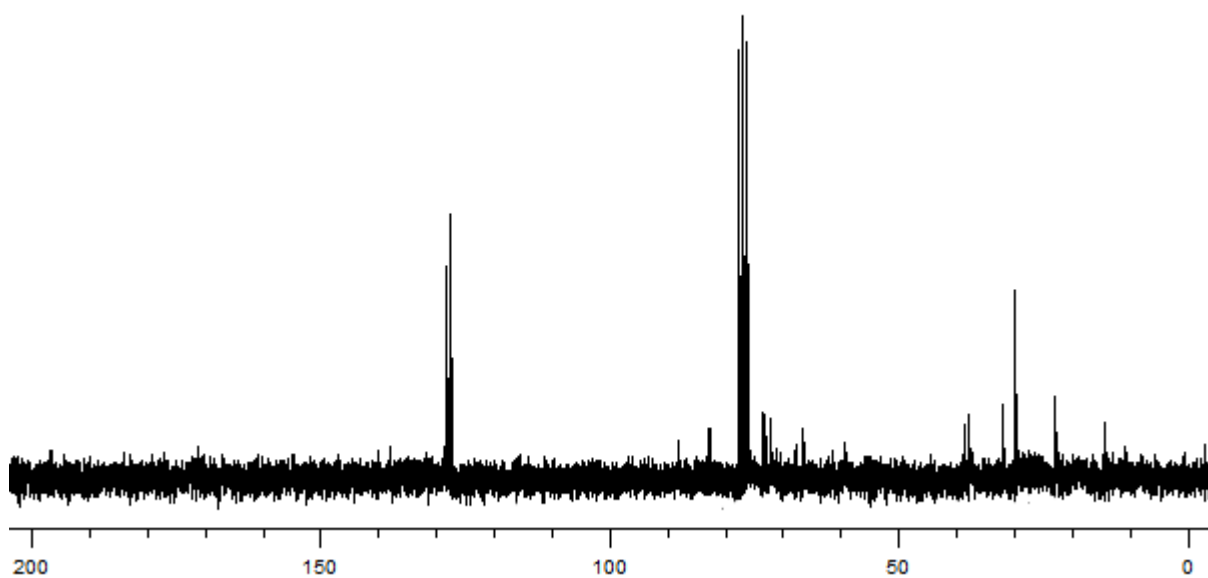

S56. <sup>13</sup>C-NMR spectrum of compound 29 (50 MHz, CDCl<sub>3</sub>).

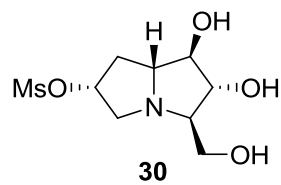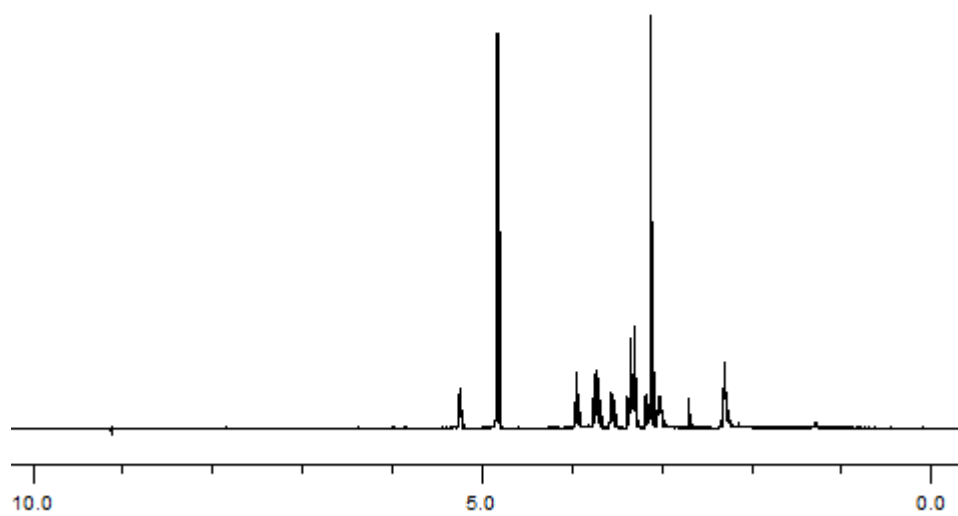

S57. <sup>1</sup>H-NMR spectrum of compound 30 (400 MHz, CD<sub>3</sub>OD).

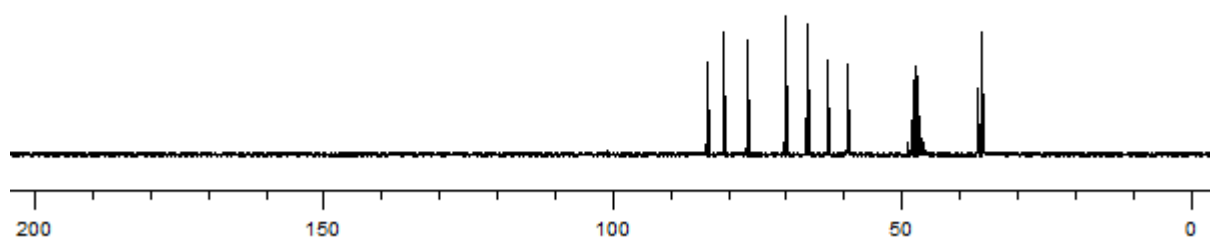

S58. <sup>13</sup>C-NMR spectrum of compound 30 (50 MHz, CD<sub>3</sub>OD).

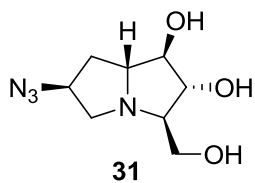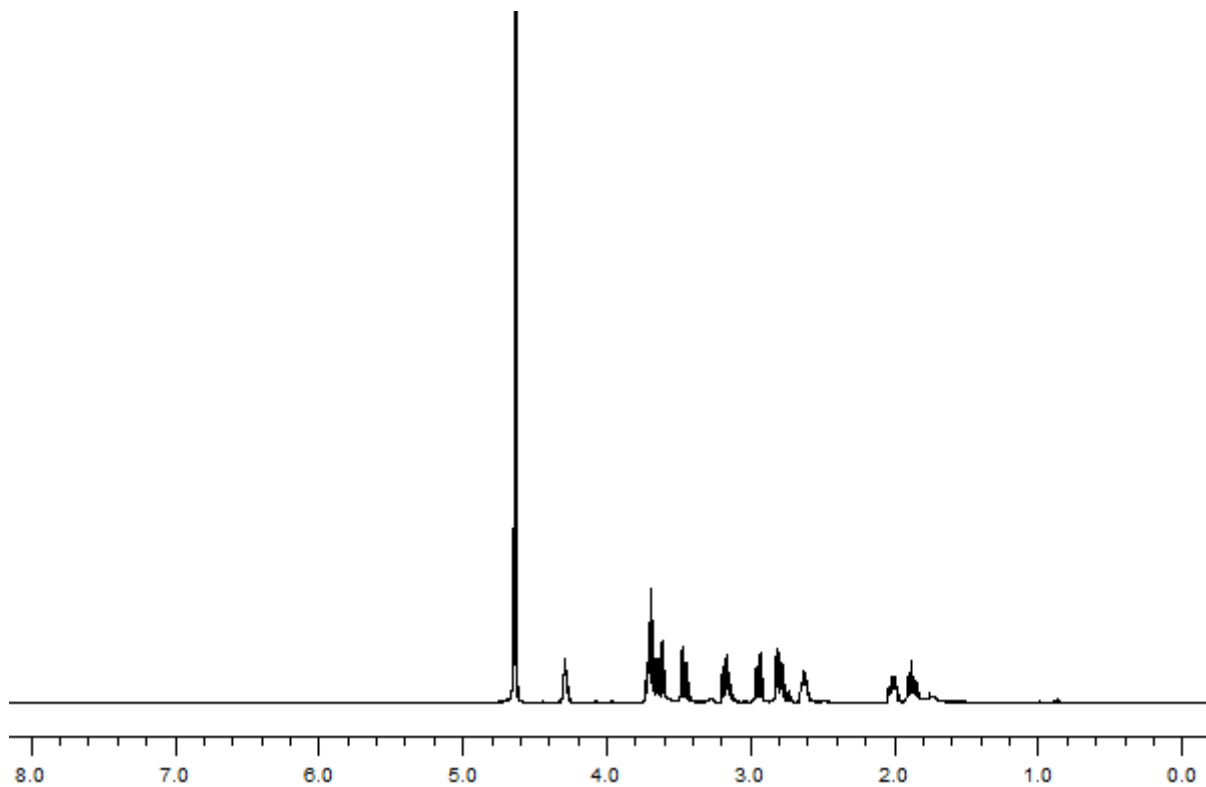

S59. <sup>1</sup>H-NMR spectrum of compound 31 (400 MHz, D<sub>2</sub>O).

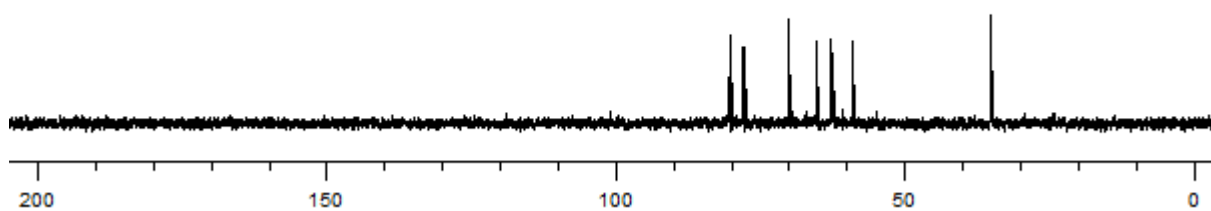

S60. <sup>13</sup>C-NMR spectrum of compound 31 (50 MHz, D<sub>2</sub>O).

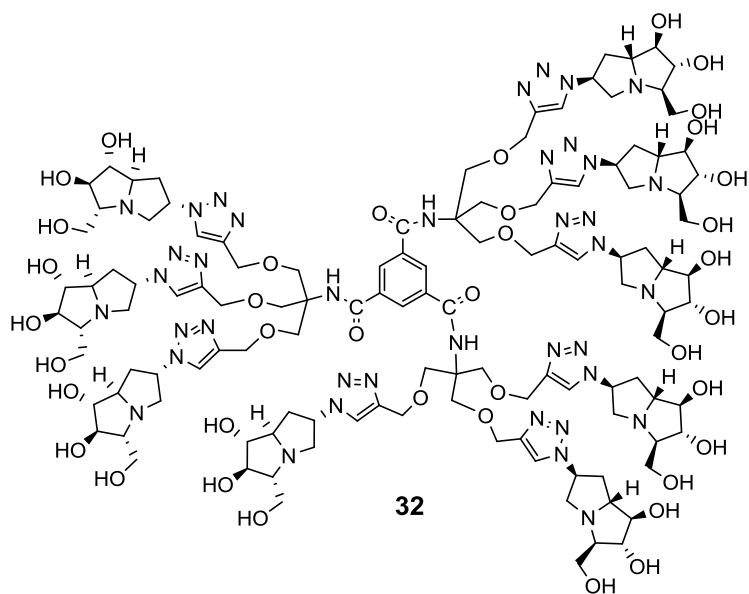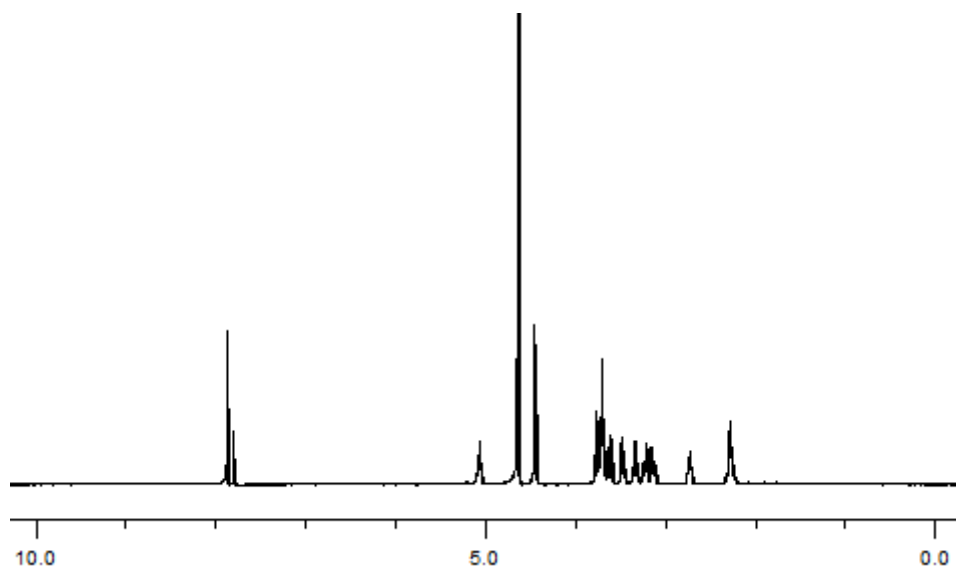

S61.  $^1\text{H}$ -NMR spectrum of compound 32 (400 MHz,  $\text{D}_2\text{O}$ ).

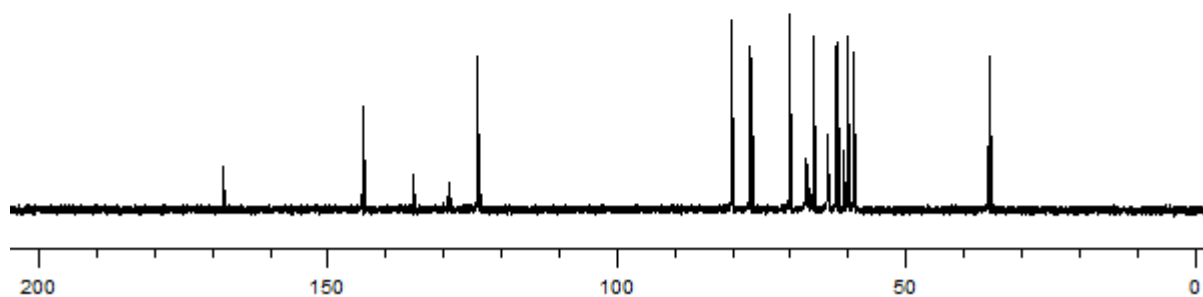

S62.  $^{13}\text{C}$ -NMR spectrum of compound 32 (50 MHz,  $\text{D}_2\text{O}$ ).

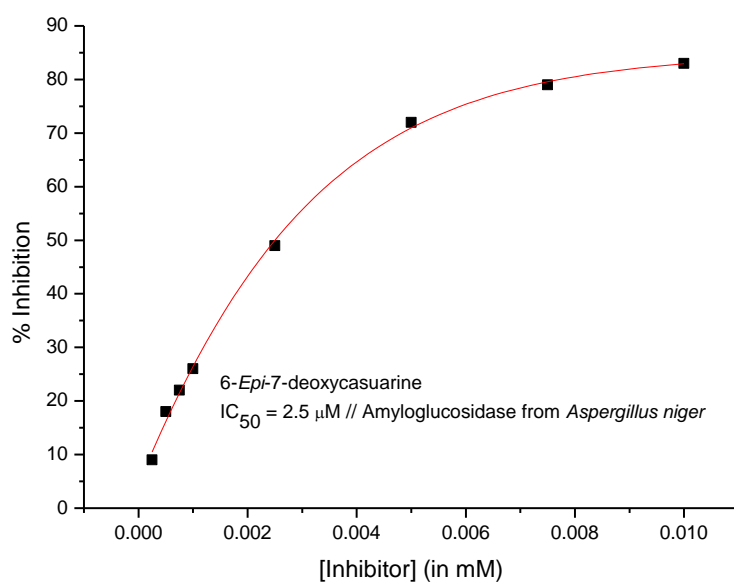

**S63.  $IC_{50}$  of 6-*epi*-7-deoxycasuarine towards Amyloglucosidase**

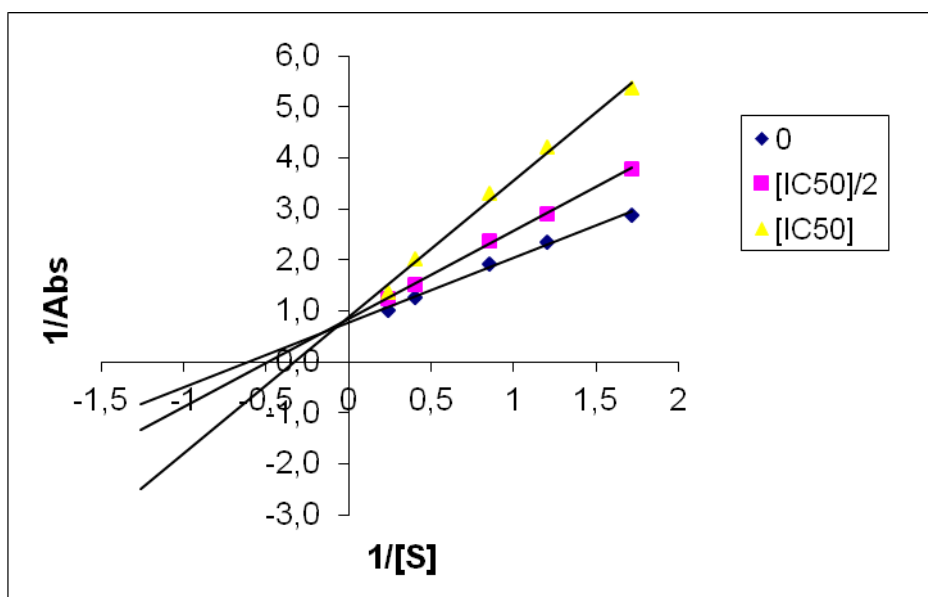

**S64. Lineweaver-Burk Plot of 6-*epi*-7-deoxycasuarine towards Amyloglucosidase**

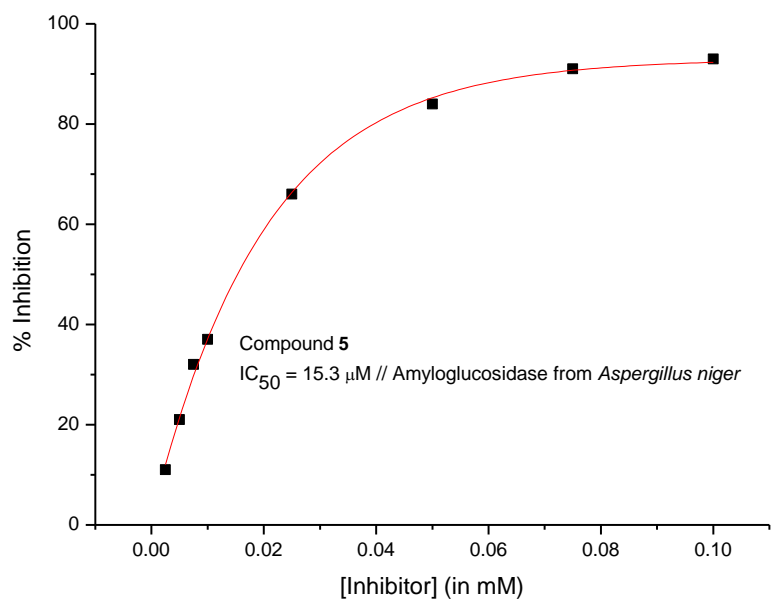

S65.  $IC_{50}$  of compound 5 towards Amyloglucosidase

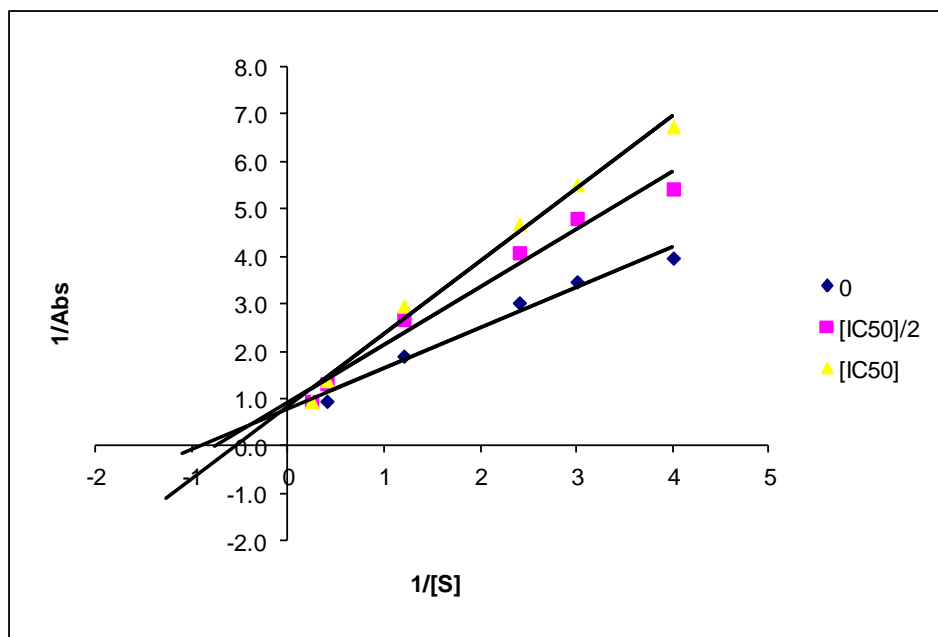

S66. Lineweaver-Burk Plot of compound 5 towards Amyloglucosidase

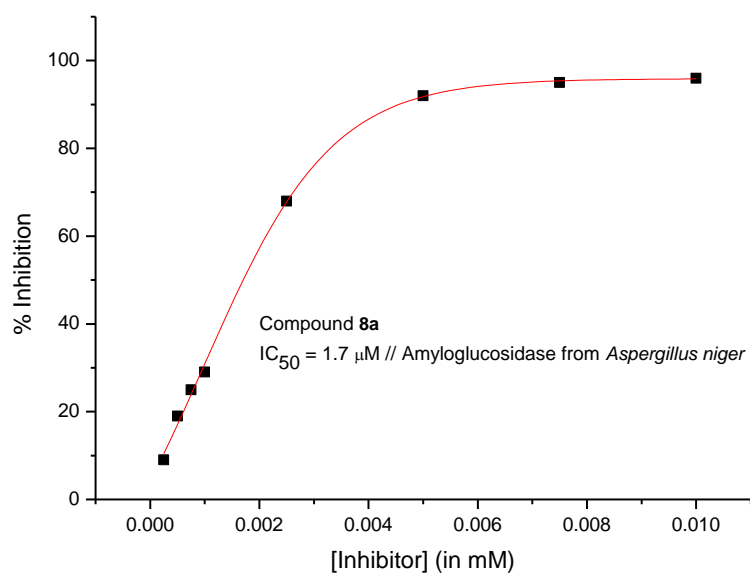

**S67.  $IC_{50}$  of compound 8a towards Amyloglucosidase**

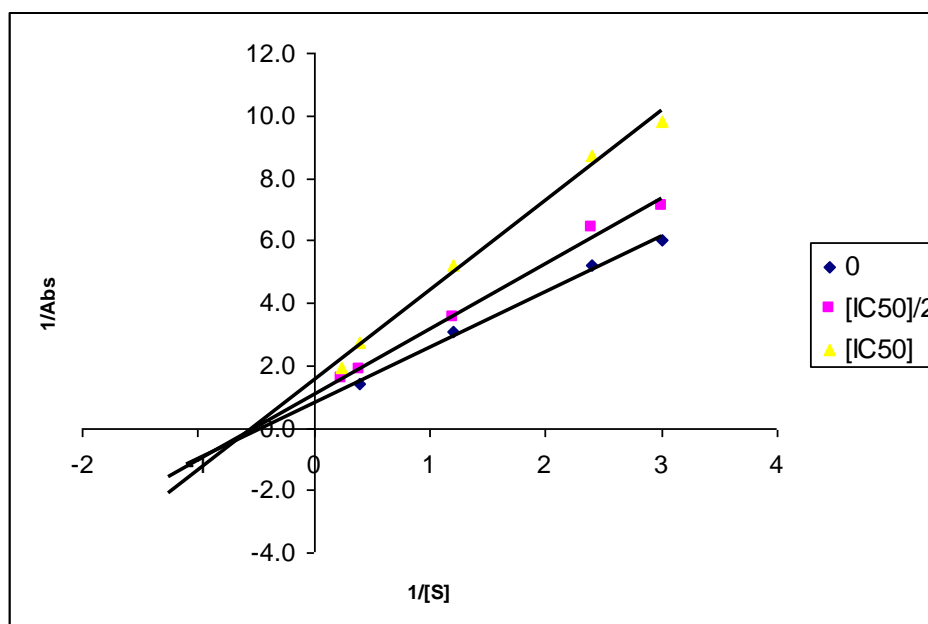

**S68. Lineweaver-Burk Plot of compound 8a towards Amyloglucosidase**



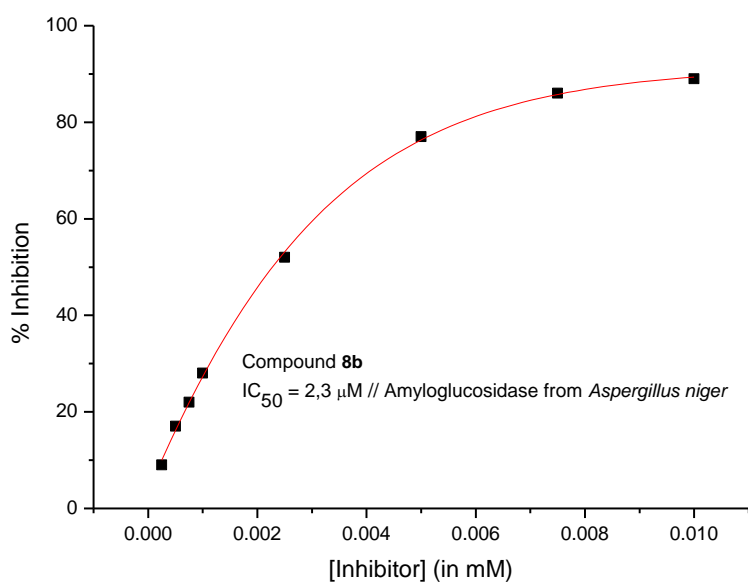

**S69.  $IC_{50}$  of compound 8b towards Amyloglucosidase**

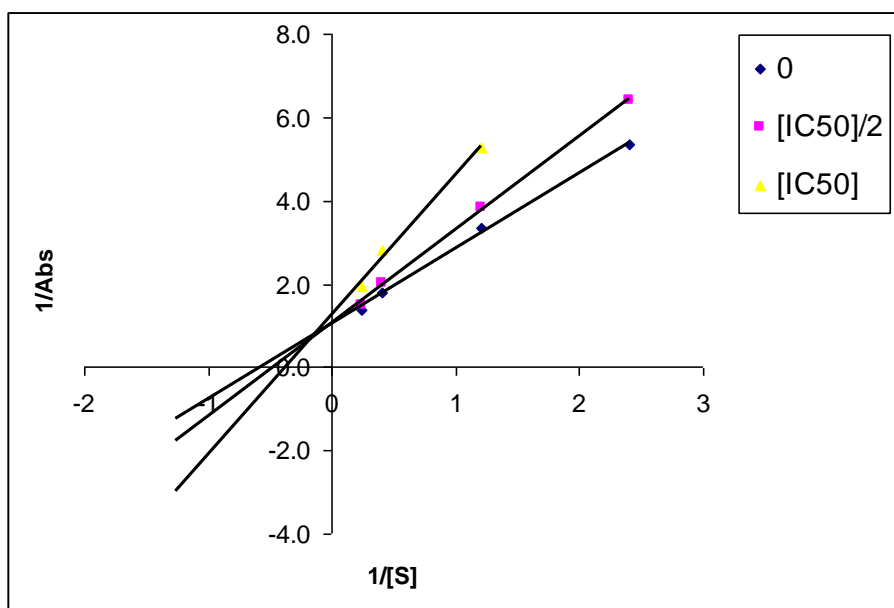

**S70. Lineweaver-Burk Plot of compound 8b towards Amyloglucosidase**

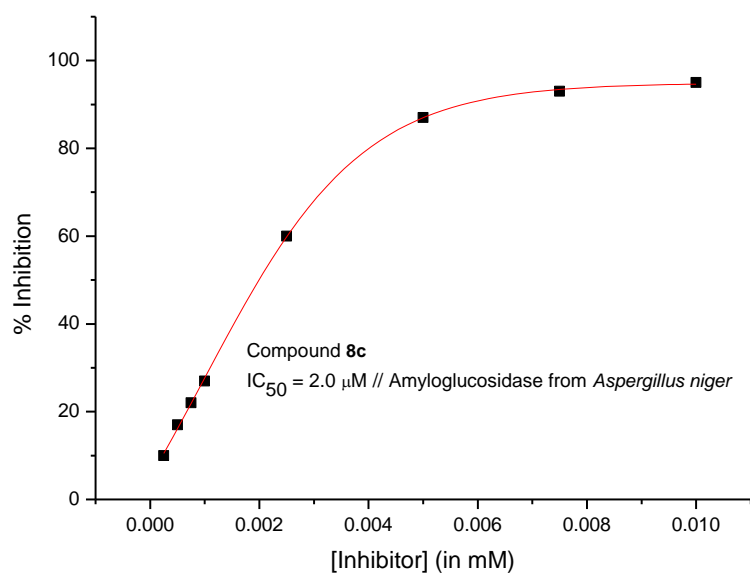

**S71. IC<sub>50</sub> of compound 8c towards Amyloglucosidase**

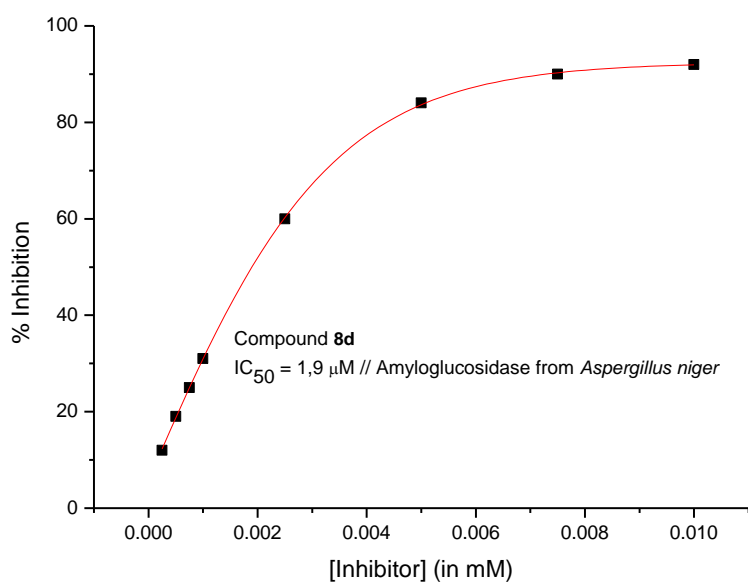

**S72.  $IC_{50}$  of compound 8d towards Amyloglucosidase**

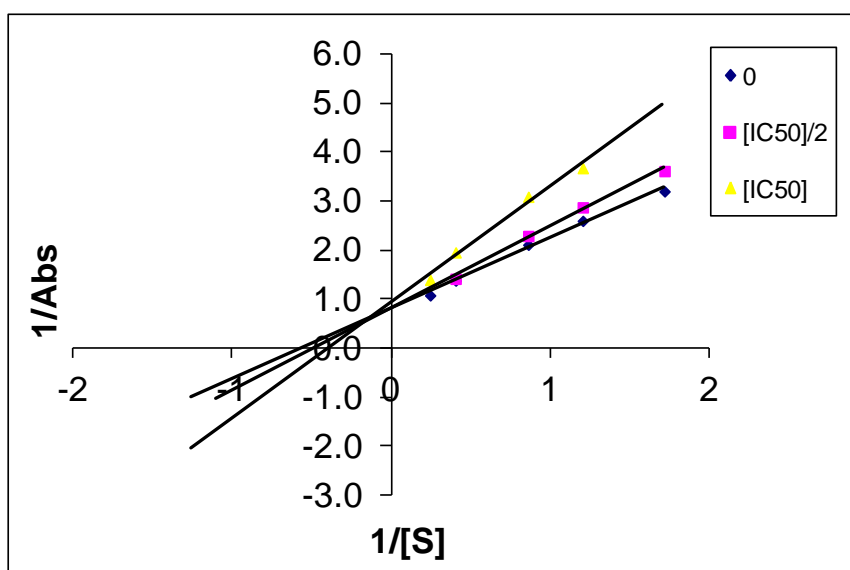

**S73. Lineweaver-Burk Plot of compound 8d towards Amyloglucosidase**

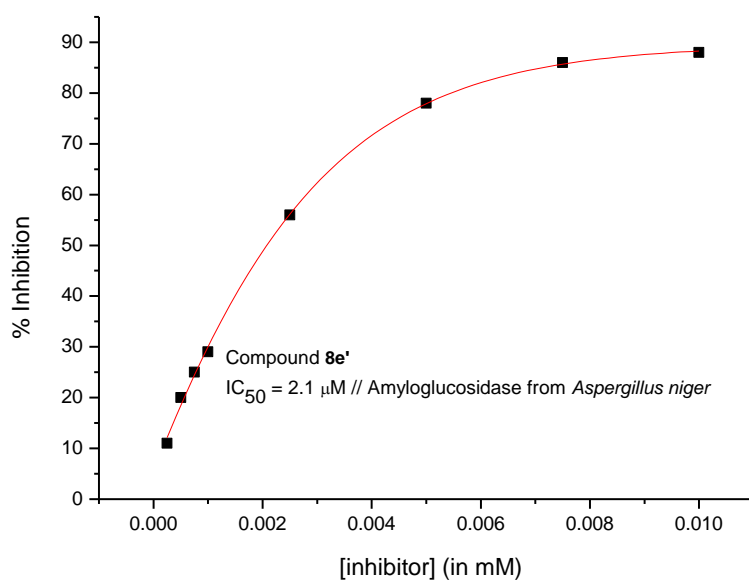

**S74.  $IC_{50}$  of compound 8e' towards Amyloglucosidase**

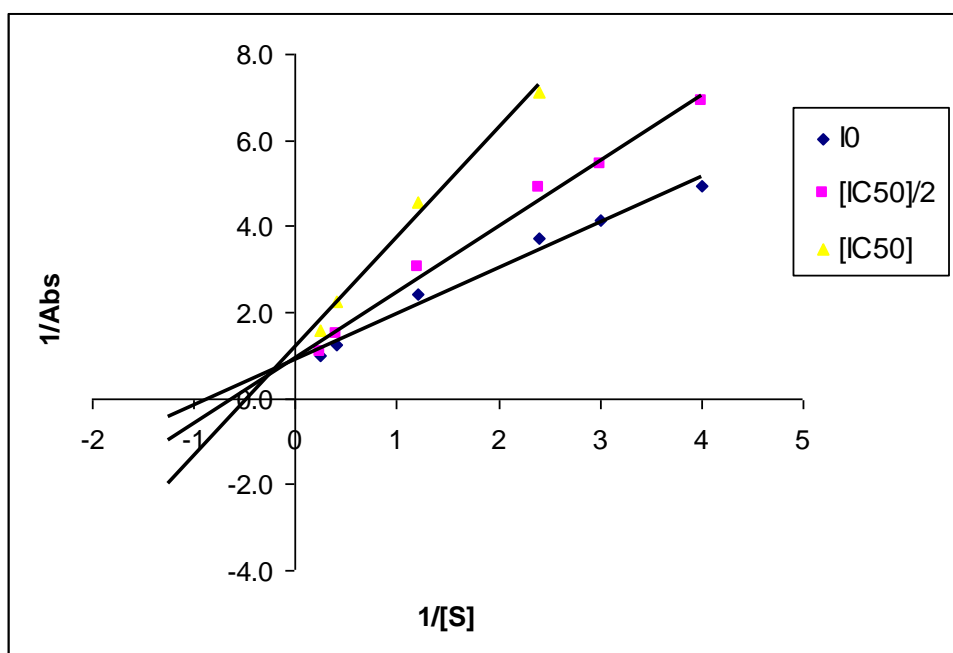

**S75. Lineweaver-Burk Plot of compound 8e' towards Amyloglucosidase**

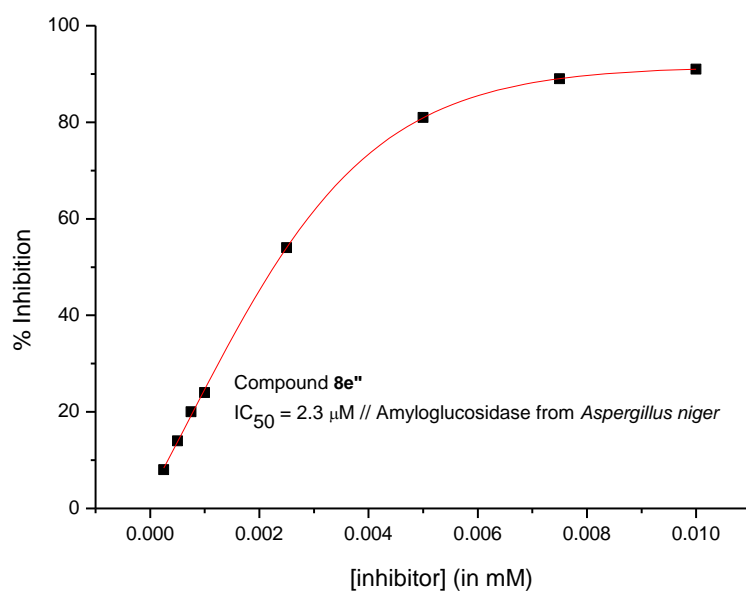

**S76.  $IC_{50}$  of compound 8e'' towards Amyloglucosidase**

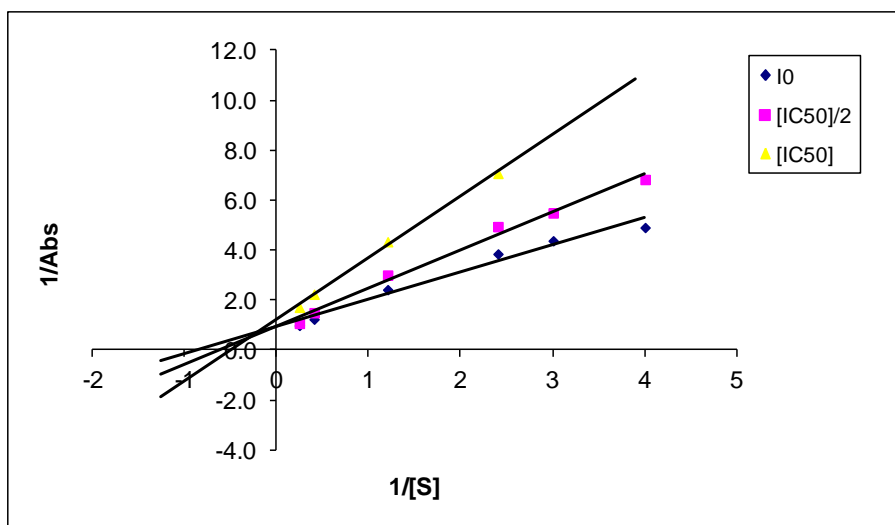

**S77. Lineweaver-Burk Plot of compound 8e'' towards Amyloglucosidase**

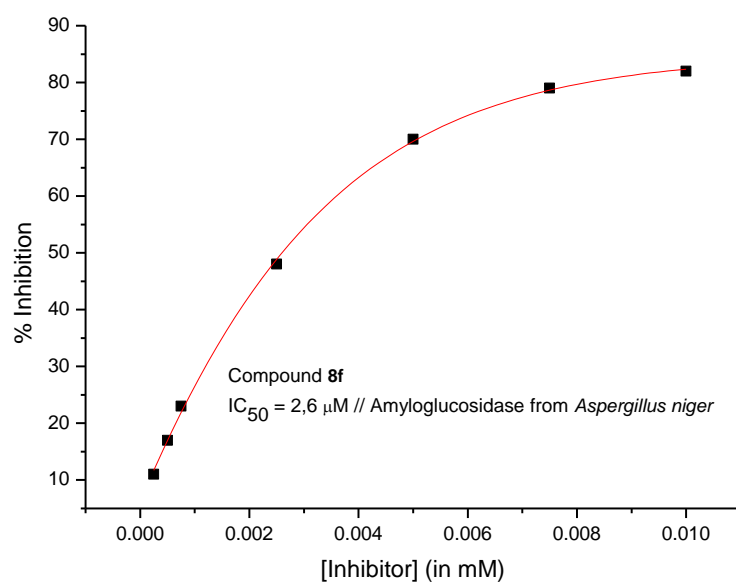

**S78.  $IC_{50}$  of compound 8f towards Amyloglucosidase**

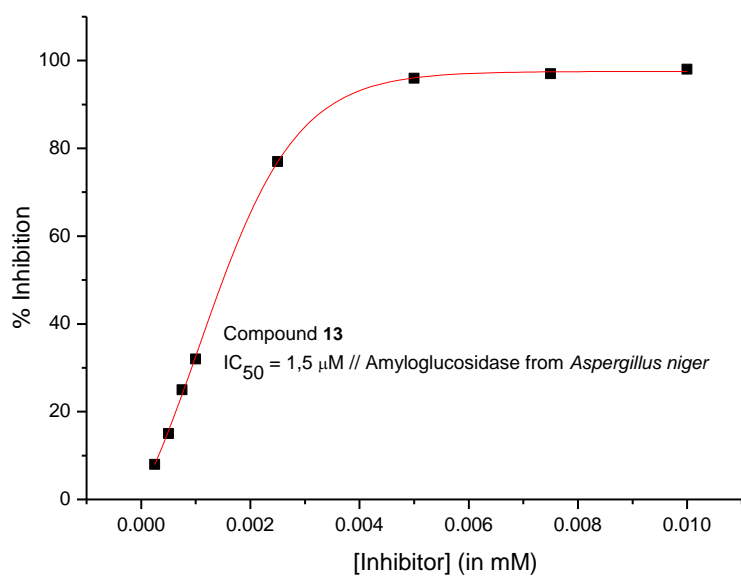

**S79.  $IC_{50}$  of compound 13 towards Amyloglucosidase**

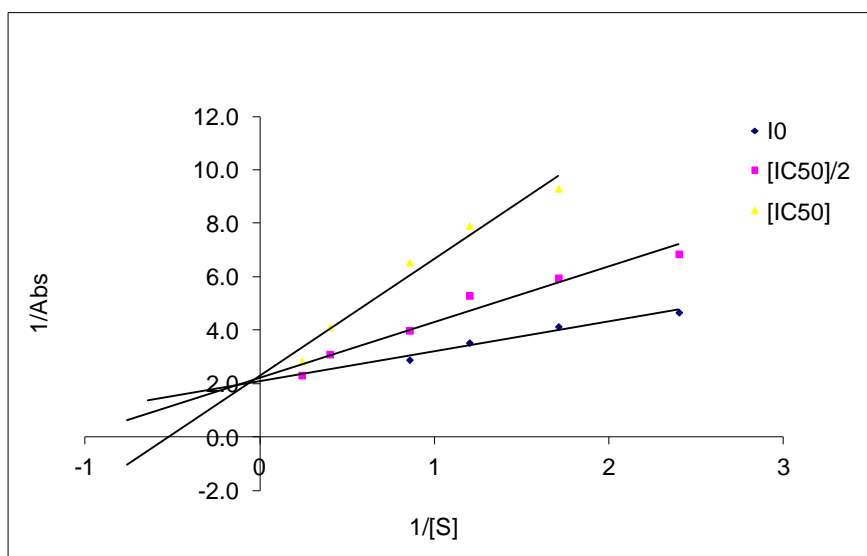

**S80. Lineweaver-Burk Plot of compound 13 towards Amyloglucosidase**

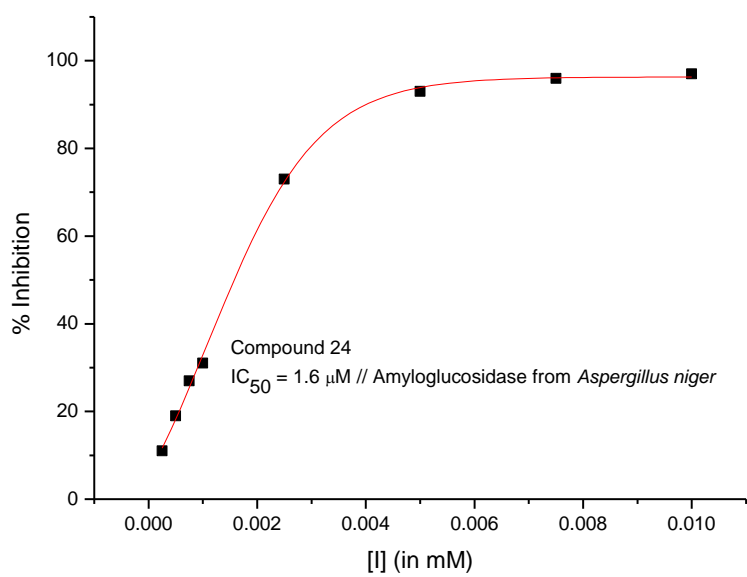

**S81.  $IC_{50}$  of compound 24 towards Amyloglucosidase**

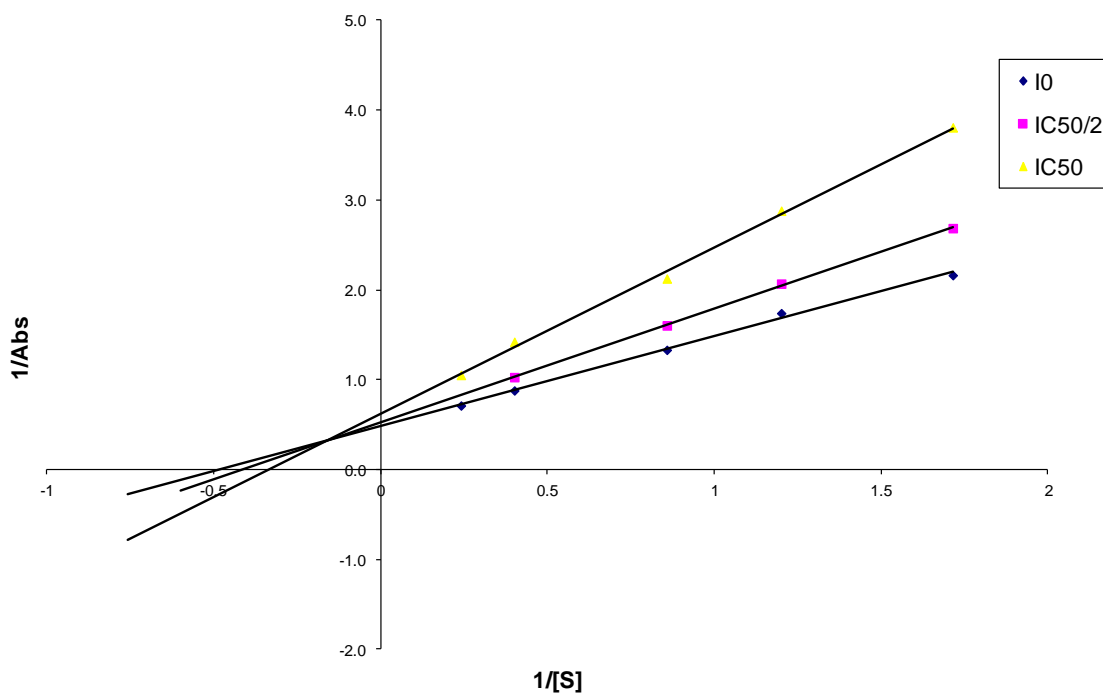

**S82. Lineweaver-Burk Plot of compound 24 towards Amyloglucosidase**



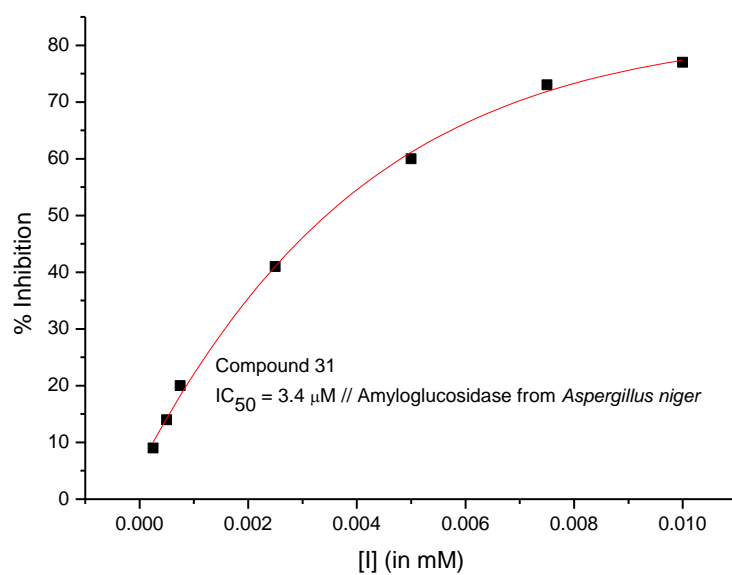

**S83.  $IC_{50}$  of compound 31 towards Amyloglucosidase**

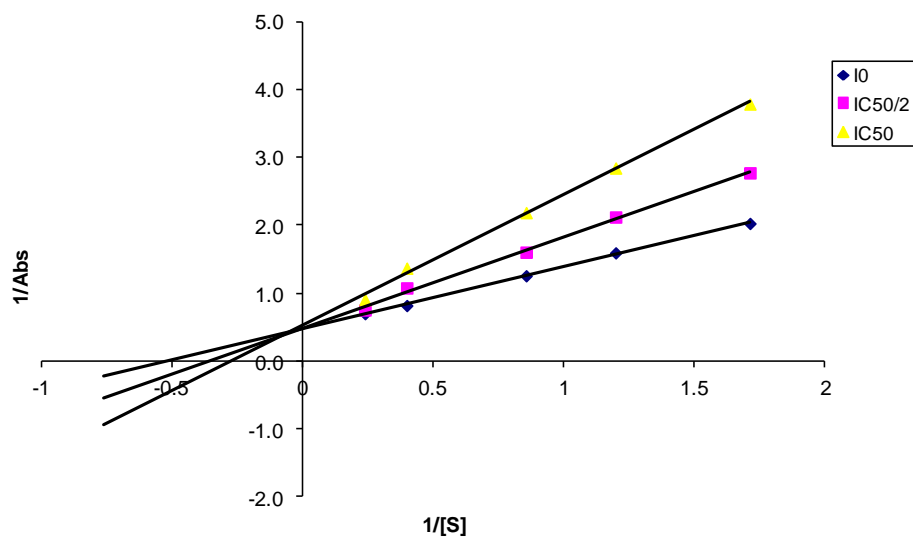

**S84. Lineweaver-Burk Plot of compound 31 towards Amyloglucosidase**

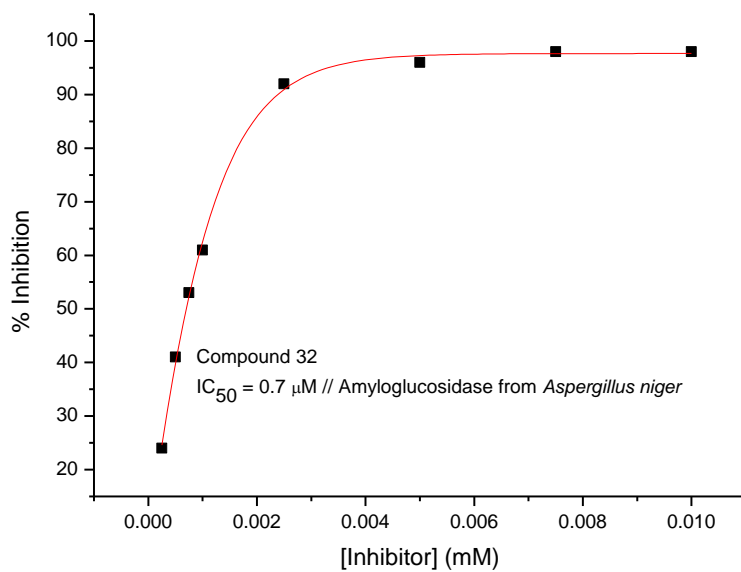

**S85.  $IC_{50}$  of compound 32 towards Amyloglucosidase**

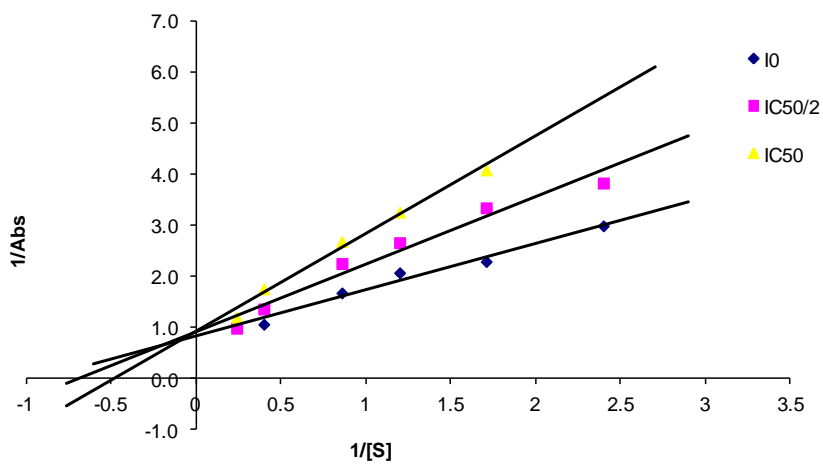

**S86. Lineweaver-Burk Plot of compound 32 towards Amyloglucosidase**
